# Supplementary material for: Prevalence of rotator cuff tendon tears and symptoms in a Chingford general population cohort, and the resultant impact on UK health services: a cross-sectional observational study
Source: PubMed Central journal article supplement — BMJ Open. 2022 Sep 13;12(9):e059175. doi: 10.1136/bmjopen-2021-059175 (PMC9472112; doi:10.1136/bmjopen-2021-059175), 2022-09-13
Supplement: bmjopen-2021-059175.draft_revisions.pdf [file bmjopen-2021-059175.draft_revisions.pdf]

# BMJ Open

BMJ Open is committed to open peer review. As part of this commitment we make the peer review history of every article we publish publicly available.

When an article is published we post the peer reviewers' comments and the authors' responses online. We also post the versions of the paper that were used during peer review. These are the versions that the peer review comments apply to.

The versions of the paper that follow are the versions that were submitted during the peer review process. They are not the versions of record or the final published versions. They should not be cited or distributed as the published version of this manuscript.

BMJ Open is an open access journal and the full, final, typeset and author-corrected version of record of the manuscript is available on our site with no access controls, subscription charges or pay-per-view fees (<http://bmjopen.bmj.com>).

If you have any questions on BMJ Open's open peer review process please email [info.bmjopen@bmj.com](mailto:info.bmjopen@bmj.com)

# BMJ Open

## Prevalence of rotator cuff tendinopathy and the resulting impact on health services: the Chingford general population cohort

|                               |                                                                                                                                                                                                                                                                                                                                                                                                                                                                                                                                     |
|-------------------------------|-------------------------------------------------------------------------------------------------------------------------------------------------------------------------------------------------------------------------------------------------------------------------------------------------------------------------------------------------------------------------------------------------------------------------------------------------------------------------------------------------------------------------------------|
| Journal:                      | <i>BMJ Open</i>                                                                                                                                                                                                                                                                                                                                                                                                                                                                                                                     |
| Manuscript ID                 | bmjopen-2021-059175                                                                                                                                                                                                                                                                                                                                                                                                                                                                                                                 |
| Article Type:                 | Original research                                                                                                                                                                                                                                                                                                                                                                                                                                                                                                                   |
| Date Submitted by the Author: | 15-Nov-2021                                                                                                                                                                                                                                                                                                                                                                                                                                                                                                                         |
| Complete List of Authors:     | Hinsley, Hannah; University of Oxford Nuffield Department of Orthopaedics Rheumatology and Musculoskeletal Sciences<br>Ganderton, Charlotte; Swinburne University of Technology Faculty of Health Arts and Design, Nursing and Allied Health<br>Arden, Nigel; University of Oxford , University of Oxford Nuffield Department of Orthopaedics Rheumatology and Musculoskeletal Sciences,<br>Carr, Andrew; University of Oxford, University of Oxford Nuffield Department of Orthopaedics Rheumatology and Musculoskeletal Sciences, |
| Keywords:                     | Shoulder < ORTHOPAEDIC & TRAUMA SURGERY, Ultrasonography < OBSTETRICS, Musculoskeletal disorders < ORTHOPAEDIC & TRAUMA SURGERY, Diagnostic radiology < RADIOLOGY & IMAGING                                                                                                                                                                                                                                                                                                                                                         |
|                               |                                                                                                                                                                                                                                                                                                                                                                                                                                                                                                                                     |

SCHOLARONE™  
Manuscripts

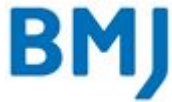

I, the Submitting Author has the right to grant and does grant on behalf of all authors of the Work (as defined in the below author licence), an exclusive licence and/or a non-exclusive licence for contributions from authors who are: i) UK Crown employees; ii) where BMJ has agreed a CC-BY licence shall apply, and/or iii) in accordance with the terms applicable for US Federal Government officers or employees acting as part of their official duties; on a worldwide, perpetual, irrevocable, royalty-free basis to BMJ Publishing Group Ltd ("BMJ") its licensees and where the relevant Journal is co-owned by BMJ to the co-owners of the Journal, to publish the Work in this journal and any other BMJ products and to exploit all rights, as set out in our [licence](#).

The Submitting Author accepts and understands that any supply made under these terms is made by BMJ to the Submitting Author unless you are acting as an employee on behalf of your employer or a postgraduate student of an affiliated institution which is paying any applicable article publishing charge ("APC") for Open Access articles. Where the Submitting Author wishes to make the Work available on an Open Access basis (and intends to pay the relevant APC), the terms of reuse of such Open Access shall be governed by a Creative Commons licence – details of these licences and which [Creative Commons](#) licence will apply to this Work are set out in our licence referred to above.

Other than as permitted in any relevant BMJ Author's Self Archiving Policies, I confirm this Work has not been accepted for publication elsewhere, is not being considered for publication elsewhere and does not duplicate material already published. I confirm all authors consent to publication of this Work and authorise the granting of this licence.

1  
2  
3 1 **Prevalence of rotator cuff tendinopathy and the resulting impact on health services: the**  
4 2 **Chingford general population cohort**  
5 3

6 4 Hannah Hinsley<sup>1\*</sup>, Charlotte Ganderton<sup>2</sup>, Nigel Arden<sup>1^</sup>, Andrew Carr<sup>1^</sup>

7 5 <sup>1</sup> The Nuffield Department of Orthopaedics, Rheumatology and Musculoskeletal Sciences, University  
8 6 of Oxford, Oxford, United Kingdom

9  
10  
11 7 <sup>2</sup> Department of Health Sciences and Biostatistics, Faculty of Health Arts and Design, Swinburne  
12 8 University of Technology, Hawthorn, Victoria, Australia  
13 9

14  
15 10 **Author information:**

16 11 Dr Hannah Hinsley; Orthopaedic Surgeon, ARUK orthopaedic clinical research fellow, The Nuffield  
17 12 Department of Orthopaedics, Rheumatology and Musculoskeletal Sciences, University of Oxford,  
18 13 United Kingdom; [hannah.hinsley@nhs.net](mailto:hannah.hinsley@nhs.net)  
19 14

20 15 <sup>^</sup>Professor Nigel Arden; Lead of Musculoskeletal Epidemiology, Deputy Director Centre for Sport,  
21 16 Exercise & Osteoarthritis Research Versus Arthritis and Fellow at the Lady Margaret Hall at The  
22 17 Nuffield Department of Orthopaedics, Rheumatology and Musculoskeletal Sciences, University of  
23 18 Oxford, United Kingdom; [nigel.arden@ndorms.ox.ac.uk](mailto:nigel.arden@ndorms.ox.ac.uk)  
24 19

25 20 Dr Charlotte Ganderton, Physiotherapist and Lecturer at the Department of Health Sciences and  
26 21 Biostatistics, Faculty of Health Arts and Design, Swinburne University of Technology, Hawthorn,  
27 22 Victoria, Australia, [cganderton@swin.edu.au](mailto:cganderton@swin.edu.au)  
28 23

29 24 <sup>^</sup>Professor Andrew Carr, Professor of Orthopaedics at The Nuffield Department of Orthopaedics,  
30 25 Rheumatology and Musculoskeletal Sciences, University of Oxford, United Kingdom; Director of the  
31 26 Botnar Research Centre; [andrew.carr@ndorms.ox.ac.uk](mailto:andrew.carr@ndorms.ox.ac.uk)  
32 27

33 28 \*Corresponding author: Dr Hannah Hinsley

34 29 Contact address: Nuffield Department of Orthopaedics, Rheumatology and Musculoskeletal Sciences,  
35 30 NIHR Biomedical Research Unit, Botnar Research Centre, University of Oxford, Nuffield  
36 31 Orthopaedic Centre, Windmill Road, OX3-7LD Oxford, United Kingdom  
37 32

38 33 <sup>^</sup>Senior co-authors  
39 34  
40 35  
41 36  
42  
43  
44  
45  
46  
47  
48  
49  
50  
51  
52  
53  
54  
55  
56  
57  
58  
59  
60

1  
2  
3 37 **Contributors:** HH, NA, AC were responsible for planning, conducting, and reporting the work  
4 38 described in the article. HH and CG drafted the manuscript. All authors approved the final version of  
5 39 the article. HH, NA and AC had access to all the data in the study and can take responsibility for the  
6 40 integrity of the data and the accuracy of the data analysis. HH is guarantor. The corresponding author  
7 41 attests that all listed authors meet authorship criteria and that no others meeting the criteria have been  
8 42 omitted. All authors fully acknowledge the contribution of the patients that participated in this study.  
9 43 No authors are employees of the National Institutes of Health.

12  
13 44 **Transparency Statement:** The lead author (the manuscript's guarantor) affirms that the manuscript  
14 45 is an honest, accurate, and transparent account of the study being reported; that no important aspects  
15 46 of the study have been omitted; and that any discrepancies from the study as planned (and, if relevant,  
16 47 registered) have been explained.

18 48  
19 49 **Role of the funding source:** Arthritis Research United Kingdom awarded the project £190,361.00 to  
20 50 cover costs to completion. Researchers were independent from the funding body. All authors, external  
21 51 and internal, had full access to all the data (including statistical reports and tables) in the study and  
22 52 can take responsibility for the integrity of the data and the accuracy of the data analysis.

23 53  
24 54 **Competing interests:** No competing interests

25 55  
26 56 **Ethics approval:** Outer North East London Research Ethics Committee (formerly Barking and  
27 57 Havering and Waltham Forest RECs), LREC (R&WF) reference ID = 96.

#### 28 58 29 59 **Patient and public involvement**

30 60 We would like to thank all the participants of the Chingford Women Study for their time.  
31 61 We would also like to thank Mrs Maxine Daniels and Dr Alan Hakim for their time and dedication,  
32 62 and both Mr Alex Nichols and Mr Michael Daines for their assistance with data collection and Dr  
33 63 Gemma Wallis for her assistance with data analysis.

#### 34 64 35 65 **Acknowledgement**

36 66 Thank you to Dr Gemma Wallis, Statistician, for reviewing statistical analysis processes used in this  
37 67 study.

38 68  
39 69 **Data sharing:** For information about the Chingford 1000 Women Study,  
40 70 email [chingford@ndorms.ox.ac.uk](mailto:chingford@ndorms.ox.ac.uk).

41 71  
42 72 **Dissemination to participants and related patient and public communities:** We will disseminate  
43 73 our findings to patient organisations and media outlets.

44 74  
45 75 **Provenance and peer review:** Not commissioned; peer reviewed at Orthopaedic meetings.  
46 76

## Structured Abstract

### Objectives:

To define the population prevalence of rotator cuff tears and test their association with pain and function loss in a general population cohort. Secondly, to determine the impact of shoulder pain in association with rotator cuff tears on primary healthcare services.

### Design:

Cross sectional observational study.

### Participants:

Individuals were part of the Chingford 1000 women cohort, a 20-year-old longitudinal population study comprising 1003 women aged between 64 and 87, and representative of the population of the UK.

### Main outcome measures:

To compare symptoms across stages of rotator cuff tendinopathy using the Oxford shoulder score, and to quantify resultant GP consultations.

### Results:

The population prevalence of full-thickness tears was 22.2%, which increased with age ( $p<0.001$ ), and in the dominant arm (RR 1.64,  $p<0.001$ ).

Although 48.4% of full-thickness tears were asymptomatic there was an association between rotator cuff tears and patient reported symptoms. Individuals with at least one full-thickness tear were 1.97 times more likely, than those with bilateral normal tendons ( $p<0.001$ ), to have symptoms. Severity of symptoms it not related to the severity of the pathology until tears are  $>2.5\text{cm}$  ( $p=0.009$ ).

8.9% of the cohort had seen their GP with shoulder pain and a full-thickness rotator cuff tear, 18.8% with an abnormality and 29.3% overall.

### Conclusion:

Rotator cuff tears are common, and primary care services are heavily impacted. As 50% of tears remain asymptomatic, future research may investigate the cause of pain and whether different treatment modalities, aside from addressing the pathology, need further investigation.

### Trial Registration:

The local ethics committee approved the study (Outer North East London Research Ethics Committee (formerly Barking and Havering and Waltham Forest RECs), LREC (R&WF) reference ID = 96).

### Strengths and limitations of this study:

- Pain on the Oxford Shoulder Score is associated with the presence of rotator cuff tendinopathy, but not the extent of structural pathology identified on ultrasound imaging.
- Rotator cuff tendinopathy poses a large burden on the healthcare system with 28.8% of people seeking GP consultation for their shoulder pain.
- This epidemiological study demonstrates association but not causality and leaves unanswered questions as to what additional factors contribute to shoulder pain.

## 125 **Introduction**

126 Musculoskeletal pain is one of the most common sources of disability in the Western world<sup>1</sup>. The  
127 shoulder is the third most common site of musculoskeletal disease<sup>2</sup>, with an estimated 20% of the  
128 population reporting pain at any given time<sup>3</sup>. Pain related to rotator cuff tears are estimated to account  
129 for 30-40% of these shoulder complaints<sup>4</sup>, causing high levels of disability and associated healthcare  
130 costs<sup>5-7</sup>. High-definition ultrasound is the current gold standard for the detection of full-thickness  
131 tears, and is a valid tool to detect an abnormal tendon enthesis<sup>8</sup>, but has poorer accuracy to detect  
132 partial-thickness tears<sup>8-14</sup>. Full thickness tears are recognised to be common and associated with  
133 increasing age<sup>15-18</sup>, however, prevalence in symptomatic and asymptomatic shoulders varies widely  
134 across cadaveric<sup>19</sup>, radiological<sup>19</sup> and retrospective cohort studies<sup>16-18 20-28</sup>. Furthermore, the presence  
135 of selection bias in studies undertaken in rotator cuff tendon tears<sup>16-28</sup>, has meant population-based  
136 studies available, are not representative of Western demographics. Thus, research in this area may  
137 lead to a better understanding of the natural history of rotator cuff tears.

139 Clinical manifestations of rotator cuff tears are varied<sup>15 17 22 26 28</sup>, and detection of pathology and its  
140 relationship to clinical symptoms is not well established. Many tears are asymptomatic but are  
141 thought to be at risk of developing symptoms with time<sup>26</sup>. Although larger tears are more likely to be  
142 painful, there is also no evidence to suggest that they have a greater severity of symptoms than  
143 smaller tears<sup>29</sup>. One population cohort from a mountainous region has suggested that only a third of  
144 full-thickness tears were painful, of which symptoms were more prevalent in the dominant arm<sup>30</sup>.  
145 Though, all studies investigating symptom association have looked at isolated shoulders, and have not  
146 considered that the individual, who has two shoulders, may have a significant influence on symptoms  
147 rather than solely the underlying pathology. To date, no study has explored the association between  
148 rotator cuff tears, pain and functional loss in a general population cohort, or how these impact on a  
149 health service.

151 This study aims to: (i) describe the population prevalence of different stages of rotator cuff tear in a  
152 general population cohort of women; (ii) determine what proportion of rotator cuff tears are  
153 symptomatic, and whether the severity of symptoms correlates with tear stage severity; (iii) identify  
154 individual influences on the likelihood of symptoms and (iv) quantify the impact of symptomatic  
155 rotator cuff tears on primary health care services.

## 157 **Methods**

### 158 *Design*

159 Study participants were identified from the Chingford Study, a well described prospective population-  
160 based longitudinal study of osteoarthritis and osteoporosis, comprising 1003 women, derived from the  
161 register of a large general practice in Chingford, North London<sup>31-33</sup>. The women aged 44-67 years at  
162 baseline are representative of women in the UK general population with respect to weight, height, and  
163 smoking characteristics. The study was established in 1989 and 516 women attended the year 20  
164 follow-up visits. A musculoskeletal assessment, including the Oxford shoulder score, and bilateral  
165 shoulder ultrasound examination was performed in 463 women (of the original 1003, 158 women had  
166 died, 111 were unable to attend, 218 had moved away or been lost to follow up, 52 attended the year  
167 20 visit but did not have a shoulder assessment due to lack of assessor, and 1 did not complete an  
168 Oxford shoulder score). The local ethics committee approved the study and consent was obtained  
169 from each woman (Outer North East London Research Ethics Committee (formerly Barking and  
170 Havering and Waltham Forest RECs), LREC (R&WF) reference ID = 96).

1  
2  
3 172 *Outcome measures:*

4 173 Participant characteristics of age, height, weight, hand dominance, and a self-reported  
5 174 musculoskeletal questionnaire filled out a priori (including the Oxford Shoulder Score<sup>34 35</sup>, body chart  
6 175 and questions regarding previous pain, treatments and whether medical advice has been sought), were  
7 176 all collected at baseline. A musculoskeletal ultrasound assessment on bilateral shoulders was then  
8 177 undertaken using a fixed SOPP (standard operating procedure protocol).

9 178  
10 179 The ultrasound examination of the 464 women was completed by two orthopaedic assessors and  
11 180 performed using a GE voluson i-portable ultrasound machine with a 10-16MHz linear probe.  
12 181 Ultrasound training and appropriate validation studies<sup>36</sup> were completed as recommended by the  
13 182 BESS focus group - 343 individuals were scanned by assessor 1 and 121 individuals by assessor two.  
14 183 Appropriate inter and intra-rater reliability studies were performed and showed high reproducibility  
15 184 (weighted kappa 0.92  $p < 0.001$ ) and no difference in reporting trends ( $p = 0.08$ ). The ultrasound  
16 185 protocol was derived according to the recommendations of the Nuffield Orthopaedic Centre  
17 186 Musculoskeletal radiology department. Tendons were classified into one of four working groups  
18 187 based upon ultrasound measurements as validated by Hinsley et al.<sup>8</sup>: (i) normal tendon; (ii) abnormal  
19 188 tendon and partial thickness tear; (iii) single tendon full-thickness tears (0-2.5cm) and (iv) multi-  
20 189 tendon full-thickness tears ( $> 2.5$ cm) (Figure 1).

21 190  
22 191 Figure 1: Ultrasound images

23 192 *Data Analysis*

24 193 All statistics were performed using IBM SPSS Statistics version 22 (IBM, Armonk, NY, USA).  
25 194 Age, BMI, hand dominance, and symptom presence were compared across the four different  
26 195 tendinopathy groups. Wilcoxon rank sum test, one-way ANOVA, and chi-squared tests were used for  
27 196 non-normal, normal and categorical data respectively.

28 197  
29 198 Population prevalence of full-thickness tears was defined as having at least one unilateral full-  
30 199 thickness tear. Population prevalence of tendon abnormalities was defined as having at least a  
31 200 unilateral tendon abnormality ranging from abnormal enthesis to a full thickness tear. This was  
32 201 calculated by summing the percentage with unilateral tears and the percentage with bilateral tears for  
33 202 each age group.

34 203  
35 204 Binary symptoms were defined using a dichotomised Oxford shoulder score<sup>34 35</sup> where, any non-  
36 205 perfect score ( $\leq 47/48$ ) was classified as symptomatic. Where questions are pain specific, the four  
37 206 pain specific questions of the OSS were used as a sub-scale. In symptomatic participants, the full OSS  
38 207 scale, scored on a 0-48 point scale, was used to define symptom severity. A  $\chi^2$  test was used to  
39 208 determine any difference between tendinopathy groups. Multivariate binary logistic regression was  
40 209 used to adjust for the potential confounders age, BMI and hand dominance determined a priori. To  
41 210 account for a high positive skew of the OSS data, all asymptomatic shoulders were removed, and a  
42 211 logarithmic transformation of the inverse OSS was used to create a normal distribution. Symptom  
43 212 severity in symptomatic shoulders was compared across tendinopathy groups using a 1-way ANOVA.  
44 213 Multivariate linear regression was used to adjust for potential confounders age, and hand dominance  
45 214 determined a priori.



## 215 Results

216 464 individuals (928 shoulders) were included in the study (Table 1). The distribution of age across  
 217 each tendinopathy group was significantly different ( $p<0.001$ ), with age increasing in accordance with  
 218 tear severity. There was a statistical difference in the proportion of dominant and non-dominant arms  
 219 in each tendinopathy group ( $p=0.033$ ), with there being significantly more non-dominant arms in the  
 220 normal tendon group ( $p=0.010$ ), and significantly more dominant arms in those with full-thickness  
 221 tears ( $p=0.026$ ). There were no between-group differences in BMI ( $p=0.080$ ).

222  
 223 Table 1. Demographics of shoulders included in the study

|                                | Frequency | %     | Median age | Mean BMI | Dominant arm (%) |
|--------------------------------|-----------|-------|------------|----------|------------------|
| Normal                         | 510       | 55.0% | 70         | 27.5     | 46.1%            |
| Abnormal/ Partial tear         | 294       | 31.7% | 73         | 28.0     | 52.7%            |
| Full-thickness tears (0-2.5cm) | 85        | 9.2%  | 74         | 27.9     | 58.8%            |
| Full-thickness tears (>2.5cm)  | 39        | 4.2%  | 74         | 29.6     | 61.5%            |
| All                            | 928       | 100%  | 71         | 27.8     | 50%              |

### 224 Prevalence of rotator cuff tendinopathy

225 The population prevalence of having at least one full-thickness tear was 22.2% (4.5% bilateral). For  
 226 age groups 60-69, 70-79 and 80-89 these were 14.9%; 25.9% and 29% respectively, and bilateral tears  
 227 2.3%; 5.9% and 5.8% respectively. The difference in prevalence between age groups was statistically  
 228 different ( $p<0.001$ ).

229  
 230 The population prevalence of having at least a unilateral tendinopathy or tear was 59.5% (30.6%  
 231 bilateral). For age groups 60-69, 70-79 and 80-89 these were 51.5%; 61.8% and 72.5% respectively,  
 232 and bilateral tears 24.6%; 32.3% and 40.6% respectively. The difference in population prevalence  
 233 between age groups was statistically significant ( $p<0.001$ ).

234  
 235 Table 2 shows the prevalence of rotator cuff tendinopathy in the dominant and non-dominant arms in  
 236 age deciles. The distribution of tendinopathy differed between age groups (Dominant arm  $p=0.002$ ;  
 237 non-dominant arm  $p=0.037$ ) with more pathology found in older age groups, and in the dominant  
 238 compared to non-dominant arms ( $p=0.004$ ). There was no difference in prevalence according to BMI  
 239 group. The relative risk of full-thickness tear was 1.64 (1.073-2.326,  $p=0.021$ ) in the dominant  
 240 compared to non-dominant arm. For those aged 70-79 it was 2.072 (1.286-3.190,  $p=0.002$ ), and aged  
 241 80-89 was 2.293 (1.264-4.027,  $p=0.006$ ), compared to those aged 60-69.

242  
 243 Table 2. Prevalence of rotator cuff tendinopathy according to age decile and arm dominance

|                                        | Age Group     |       |               |       |              |       |               |       |
|----------------------------------------|---------------|-------|---------------|-------|--------------|-------|---------------|-------|
|                                        | 60-69 (n=175) |       | 70-79 (n=220) |       | 80-89 (n=69) |       | Total (n=464) |       |
|                                        | Count         | %     | Count         | %     | Count        | %     | Count         | %     |
| <b>Dominant arm</b>                    |               |       |               |       |              |       |               |       |
| Normal tendon                          | 102           | 58.3% | 111           | 50.5% | 22           | 31.9% | 235           | 50.6% |
| Abnormal tendon/Partial thickness tear | 54            | 30.9% | 67            | 30.5% | 34           | 49.3% | 155           | 33.4% |
| Full-thickness tear 0-2.5 cm           | 14            | 8.0%  | 27            | 12.3% | 9            | 13.0% | 50            | 10.8% |
| Full-thickness tear >2.5 cm            | 5             | 2.9%  | 15            | 6.8%  | 4            | 5.8%  | 24            | 5.2%  |
| <b>Non-dominant arm</b>                |               |       |               |       |              |       |               |       |
| Normal tendon                          | 115           | 65.7% | 122           | 55.5% | 38           | 55.1% | 275           | 59.3% |

|                                        | Age Group     |       |               |       |              |       |               |       |
|----------------------------------------|---------------|-------|---------------|-------|--------------|-------|---------------|-------|
|                                        | 60-69 (n=175) |       | 70-79 (n=220) |       | 80-89 (n=69) |       | Total (n=464) |       |
|                                        | Count         | %     | Count         | %     | Count        | %     | Count         | %     |
| <b>Dominant arm</b>                    |               |       |               |       |              |       |               |       |
| Normal tendon                          | 102           | 58.3% | 111           | 50.5% | 22           | 31.9% | 235           | 50.6% |
| Abnormal tendon/Partial thickness tear | 54            | 30.9% | 67            | 30.5% | 34           | 49.3% | 155           | 33.4% |
| Full-thickness tear 0-2.5 cm           | 14            | 8.0%  | 27            | 12.3% | 9            | 13.0% | 50            | 10.8% |
| Full-thickness tear >2.5 cm            | 5             | 2.9%  | 15            | 6.8%  | 4            | 5.8%  | 24            | 5.2%  |
| Abnormal tendon/Partial thickness tear | 49            | 28.0% | 70            | 31.8% | 20           | 29.0% | 139           | 30.0% |
| Full-thickness tear 0-2.5 cm           | 10            | 5.7%  | 18            | 8.2%  | 7            | 10.1% | 35            | 7.5%  |
| Full-thickness tear >2.5 cm            | 1             | 0.6%  | 10            | 4.5%  | 4            | 5.8%  | 15            | 3.2%  |

244

245 *Association of symptoms (all shoulders)*

246 An analysis of symptom association was completed in 926 shoulders (463/464 participants due to loss  
 247 of one questionnaire). There were 289 (31.2%) symptomatic shoulders according to a dichotomised  
 248 OSS. The presence of symptoms was statistically significant between tendon groups ( $p<0.001$ );  
 249 51.6% of all full-thickness tears were symptomatic. There was no difference in age, BMI or arm  
 250 dominance between symptomatic or asymptomatic shoulders. The relative risks of having symptoms  
 251 compared to those with a reported normal tendon were as follows: Abnormal/Partial tears 1.969; full-  
 252 thickness tears 0-2.5cm 2.203; and full-thickness tears >2.5cm 4.718. All were significant ( $p<0.001$ )  
 253 with the model correctly predicting 71% of symptom outcomes correctly.

254

255 Figure 2. Distribution of symptoms across each tendon group

256 *Symptom severity*

257 For the 289 symptomatic shoulders the full OSS was reported (Table 3). Median age was significantly  
 258 different between groups ( $p=0.047$ ), with age increasing with tear stage severity. No statistically  
 259 significant between-group differences in BMI were identified, nor any within-group differences for  
 260 arm dominance.

261

262 Table 3. Symptom severity demographics

|                              | N   | Median age | Mean BMI | Dominant arm (%) |
|------------------------------|-----|------------|----------|------------------|
| Normal                       | 116 | 70         | 28.3     | 46.6%            |
| Abnormal/Partial tear        | 109 | 73         | 28.4     | 54.1%            |
| Full-thickness tears 0-2.5cm | 35  | 72         | 28.1     | 62.9%            |
| Full-thickness tears >2.5cm  | 29  | 73         | 30.3     | 58.6%            |
| All                          | 289 | 71         | 28.5     | 50%              |

263

264 The mean OSS for symptomatic shoulders was 41.8. For normal tendons this was 42.5, abnormal  
 265 tendons, 42.1; full-thickness tears (0-2.5cm), 40.2; and full-thickness tears (>2.5cm), 38.4. There was  
 266 a statistical difference between the groups (1 way ANOVA  $p=0.030$ ). Linear regression analysis after  
 267 adjustment for age, BMI, and hand dominance (no interactions identified), showed that the only  
 268 significant difference in OSS scores was between normal tendons (mean OSS 42.5) and large full-  
 269 thickness tears (OSS 38.3),  $p=0.009$ , power 0.75 (overall model  $p=0.007$ , power 0.892).

270

271 *Association of symptoms (individuals)*

272 Table 4 shows the relationship between the individual, presence of full-thickness rotator cuff tear and  
 273 the likelihood of symptoms. A clustering effect of bilateral symptoms or lack thereof is present,  
 274 irrespective of the underlying pathology. After adjustment for age and BMI, compared to those with  
 275 bilaterally normal shoulders the relative risk of having at least one symptomatic shoulder in the  
 276 presence of a full thickness rotator cuff tear is 1.49, and 1.97 in the presence of at least a unilateral  
 277 abnormality or cuff tear.

279 Table 4. Distribution of individual shoulder symptoms according to the presence of full-thickness  
 280 tears

|                  | No Symptoms | Unilateral Symptoms | Bilateral Symptoms | Total |
|------------------|-------------|---------------------|--------------------|-------|
| Bilateral No FTT | 226         | 71                  | 63                 | 360   |
| Unilateral FTT   | 33          | 25                  | 24                 | 82    |
| Bilateral FTT    | 10          | 3                   | 8                  | 21    |
| Total            | 269         | 99                  | 95                 | 463   |

281 *Shoulder pain and use of primary care health services*

282 Table 5 shows the proportion of individuals with shoulder pain, past or present, seeking medical  
 283 advice. The likelihood of seeking medical attention for shoulder pain was statistically different  
 284 between each pathology group (Chi<sup>2</sup> test p=0.005) reflecting the increasing likelihood of pain.  
 285 However, of those with pain the likelihood of seeking medical attention was not statistically different  
 286 between groups (Chi<sup>2</sup> test p=0.179). Overall, 28.3% (131/463) of all individuals had at some stage  
 287 seen their GP for shoulder pain. 8.9% (41/463) of this cohort had seen their GP with shoulder pain  
 288 and a full-thickness tendon tear and 18.8% (87/463) had seen their GP with an abnormal tendon or  
 289 full thickness tear.

291 A multivariable regression model using all individuals was used to predict the likelihood of attending  
 292 a GP for shoulder pain. The presence of at least one full-thickness tear had a relative risk of 1.6  
 293 compared to those with normal tendons of attending the GP. There was no statistical difference in  
 294 relative risk of those with any tendon abnormality compared to those with bilaterally normal  
 295 shoulders.

297 Table 5. Proportion of individuals seeking medical advice

|                                          | Present symptoms<br>(either shoulder) |                | Past or Present<br>symptoms<br>(either shoulder) |                 | All individuals<br><br>% seen GP |
|------------------------------------------|---------------------------------------|----------------|--------------------------------------------------|-----------------|----------------------------------|
|                                          | %                                     | % seen GP      | %                                                | % seen GP       |                                  |
| All individuals<br>(n=463)               | 41.9<br>(n=194)                       | 44.8<br>(n=87) | 55.7<br>(n=258)                                  | 50.8<br>(n=131) | 28.3<br>(n=131)                  |
| Bilaterally normal<br>tendons<br>(n=187) | 29.9<br>(n=56)                        | 41.1<br>(n=23) | 48.1<br>(n=90)                                   | 48.9<br>(n=44)  | 23.5<br>(n=44)                   |

|                                                  |                |                |                |                |                |
|--------------------------------------------------|----------------|----------------|----------------|----------------|----------------|
| At least one abnormality<br>(no tear)<br>(n=173) | 45.1<br>(n=78) | 41.0<br>(n=32) | 57.2<br>(n=99) | 46.5<br>(n=46) | 26.6<br>(n=46) |
| At least one full-<br>thickness tear<br>(n=103)  | 58.3<br>(n=60) | 53.3<br>(n=32) | 67.0<br>(n=69) | 59.4<br>(n=41) | 39.8<br>(n=41) |

298

**Discussion****Statement of principle findings**

Using a large general population cohort of women aged 65-84 years, this study has reported on the prevalence of rotator cuff pathology, the association of pathology to symptoms and uniquely the consequential impact on health services.

304

The prevalence of rotator cuff pathology has been well reported in the literature, and this general population study, supports previous findings. Prevalence was found to increase with every decile of age, and the relative risk of having a full thickness tear increased more than two-fold between the 65-69 and >80 age groups, suggesting a gradual decline of tendon tissue in response to aging. Overall, the prevalence of at least a unilateral full thickness tear was 22%. The dominant arm was 1.64 times likely to be affected, inferring that the presence of pathology may exist in shoulders with higher cumulative loading with functional tasks.

312

The relative risk of having symptomatic pathology (worsening OSS scores) increased with tear stage severity, though the severity of symptoms did not increase accordingly. Although larger tear size increased the likelihood of symptom presence, 48.4% of full-thickness rotator cuff tears remained asymptomatic.

317

The burden of musculoskeletal shoulder pain on health services is large, with 28.3% of individuals in this general population cohort having at some point sought medical advice for shoulder symptoms. This is the first study to look at the impact of rotator cuff tendinopathy and tears and the impact on the health services. Although on average only 50% of individuals with symptomatic rotator cuff tendinopathy will seek medical advice, the impact remains significant. Overall, almost 10% of individuals in the general population have sought medical advice for shoulder symptoms in the presence of a full-thickness tear, and almost 20% of the population for any tendon abnormality.

325

326

**Strengths and weaknesses of this study**

The major strength of this study is that it uses a large general population cohort, and therefore not subject to selection bias. The cohort was originally investigated with the primary focus of osteoporosis, and not shoulder symptoms, thus any continued participation is not driven by shoulder symptoms.

332

However, there are some potential limitations with the cohort used. Firstly, the cohort can only comment on associations in women aged between 65 and 84, but as previous studies have found no relationship between symptoms and age or sex<sup>23 30</sup>, this will not bias the results. Potential survival bias is introduced by the cohort being in its 20<sup>th</sup> year, though, no known associations exist between shoulder pain and other medical co-morbidities. Furthermore, as the prime goal of the cohort was not

337

338 to investigate shoulder symptoms, this had no impact on continued study participation. Furthermore,  
339 only 463/516 individuals that attended the year-20 study underwent a shoulder examination.

340

341 However, individuals that did were selected at random, and the age and BMI of the groups was not  
342 statistically different to the full cohort. Bias arising from having two examiners was ameliorated by  
343 two inter-observer reproducibility studies that demonstrated minimal effect of intra-observer analytic  
344 bias. Furthermore, to demonstrate ultrasound-scanning accuracy a learning curve study was  
345 undertaken a priori by both examiners, which demonstrated scanning accuracies comparable to those  
346 quoted in the literature. Intra-observer studies also demonstrated good reproducibility. Reducing  
347 analytic bias. Potential risk of overreporting pathology in symptomatic presentations is  
348 acknowledged, though for pragmatic reasons, the physical assessment examiner was unblinded to the  
349 OSS results.

350

351 The effect of tear size on symptom severity may have been underestimated in this study. The inability  
352 to transform the complete data set, due to the skew of the OSS data, meant all asymptomatic  
353 shoulders had to be removed and that we were only able to compare pain severity in the presence of a  
354 tear compared to a painful normal shoulder. However, this may also reduce the background noise  
355 from other painful conditions of the shoulder.

356

357 The definition of symptoms in previous studies varies widely with no consensus. The decision to use  
358 the OSS was based upon its content, construct validity in relation to our research question, and  
359 validation of use against other pain scores. Furthermore, dichotomisation of the scale at perfect vs.  
360 non-perfect scores is not validated and may make results too sensitive. However, we ran a comparison  
361 with 3-point change, as validated as clinically significant by the makers of the OSS, and there was no  
362 statistical difference.

363

### 364 **Relationship to other studies**

365 This study has demonstrated similar prevalence figures to previous studies, but it is the first to use a  
366 general population cohort that has been extensively characterised as representative of the western  
367 world population.

368

369 Further studies have shown that the clinical presentation of rotator cuff tears varies and may or may  
370 not be associated with symptoms<sup>17 22 23</sup>. This general population cohort supports this with 48.4% of  
371 full-thickness rotator cuff tears being asymptomatic. Prior to this, the only other population-based  
372 study looking at symptom association with full-thickness tears was Yamamoto et al.<sup>30</sup> that  
373 investigated symptom association with full-thickness tears using a mountain cohort in Japan. They  
374 reported 34% of full-thickness tears to be symptomatic. However, unlike the current study, it was not  
375 a general population cohort representative of western society. Furthermore, it was subject to selection  
376 bias by removing any individuals with restricted shoulder movement or previous treatments.

377

378 Further studies have suggested that tear size affects the likelihood of symptoms. The current study  
379 supports this with larger tears having a greater than 2-fold increase in relative risk of symptoms than  
380 small tears<sup>17 22 23</sup>. A previous study in the Washington series investigated by Yamaguchi et al<sup>26</sup>,  
381 reported development of symptoms in previously asymptomatic tendons in the context of a  
382 contralateral symptomatic tear. However, this study was subject to selection bias as recruitment  
383 occurred in a cohort actively being treated for contralateral symptomatic rotator cuff tears which may  
384 have strengthened associations.

385

1  
2  
3 386 This is the first study that has looked at individuals as entities, rather than shoulders, and has  
4 387 highlighted the effect the individual has on symptom presentation. It is also the first study to look at  
5 388 the impact on health services.  
6  
7 389  
8 390

9 391

#### 391 **Meaning of the study and unanswered questions:**

10 392 This study has shown that although patient reported pain on the Oxford Shoulder Score is associated  
11 393 with rotator cuff tendinopathy, it is not related to the extent of structural pathology identified on  
12 394 ultrasound imaging. The likelihood of pain also appears to be strongly dependent upon the individual  
13 395 rather than simply the pathology. Consequently, clinicians should rely less on imaging findings to  
14 396 explain the cause and severity of shoulder pain presentations. Furthermore, other drivers of shoulder  
15 397 pain should be considered (e.g. pain sensitisation), and treatment be targeted on symptom  
16 398 management rather than solely interventions to improve tendon pathology.  
17 399

20 400 Investigation into the impact of musculoskeletal shoulder pain on the healthcare system revealed that  
21 401 28.8% of people in this general population cohort sought consultation with their GP for shoulder pain,  
22 402 a third of whom had a full thickness tear, and a third with tendinopathy. This study highlights the  
23 403 huge burden of shoulder pain on the healthcare system. Though, it does not demonstrate causality of  
24 404 pain as is shown by the lack of symptoms in nearly half of cases and the lack of correlation with the  
25 405 severity of pain and pathology. Nor does it show how the individual affects pain presentation.  
26 406

28 407 This epidemiological study clearly demonstrates association but not causality and leaves unanswered  
29 408 questions as to what additional factors contribute to pain. Particularly interesting is how individuals  
30 409 may or may not have painful shoulders irrespective of the pathology. Further research into this could  
31 410 provide alternative targets to treatment methods, and potentially reduce the cost of imaging modalities  
32 411 and surgical interventions.  
33 412

#### 37 413 **Conclusion**

38 414 In conclusion, this general population study has demonstrated that full-thickness rotator cuff tears are  
39 415 common affecting 22.1% of the over 60's and tendon abnormalities affecting 59.4%. Despite 41.7%  
40 416 of individuals with a full-thickness tear (48.4% of all full-thickness tears) being asymptomatic, tendon  
41 417 abnormalities and tears are associated with pain. The likelihood, but not severity of symptoms,  
42 418 increases with greater structural damage.  
43 419

45 420 This high prevalence and association of symptoms results in a significant impact on primary care  
46 421 health services, with 28.3% of this population having presented to a GP with shoulder pain. Of these a  
47 422 third had a full-thickness tear and a third had an abnormal but not torn tendon. Overall 8.9% of this  
48 423 cohort had seen their general practitioner with shoulder pain and a full-thickness tear, and 18.8% had  
49 424 seen their general practitioner with an abnormal or torn tendon.  
50 425

#### 52 **REFERENCES**

- 54 1. Vos T, Abajobir AA, Abate KH, et al. Global, regional, and national incidence, prevalence,  
55 and years lived with disability for 328 diseases and injuries for 195 countries,  
56 1990&#x2013;2016: a systematic analysis for the Global Burden of Disease Study  
57 2016. *The Lancet* 2017;390(10100):1211-59. doi: 10.1016/S0140-6736(17)32154-2
- 58 2. Urwin M, Symmons D, Allison T, et al. Estimating the burden of musculoskeletal disorders  
59 in the community: the comparative prevalence of symptoms at different anatomical  
60

- 1  
2  
3 sites, and the relation to social deprivation. *Annals of the rheumatic diseases*  
4 1998;57(11):649-55. doi: 10.1136/ard.57.11.649 [published Online First: 1999/01/30]
- 5 3. Pope DP, Croft PR, Pritchard CM, et al. Prevalence of shoulder pain in the community: the  
6 influence of case definition. *Annals of the rheumatic diseases* 1997;56(5):308-12. doi:  
7 10.1136/ard.56.5.308
- 8 4. Bunker T. Rotator cuff disease. *Current Orthopaedics* 2002;16:223-33. doi:  
9 10.1054/cuor.2002.0257
- 10 5. Meislin RJ, Sperling JW, Stitik TP. Persistent shoulder pain: epidemiology,  
11 pathophysiology, and diagnosis. *American journal of orthopedics (Belle Mead, NJ)*  
12 2005;34(12 Suppl):5-9. [published Online First: 2006/02/03]
- 13 6. Roquelaure Y, Ha C, Leclerc A, et al. Epidemiologic surveillance of upper-extremity  
14 musculoskeletal disorders in the working population. *Arthritis Rheum*  
15 2006;55(5):765-78. doi: 10.1002/art.22222 [published Online First: 2006/10/03]
- 16 7. Ng Man Sun S, Gillott E, Bhamra J, et al. Implant use for primary hip and knee  
17 arthroplasty: are we getting it right first time? *J Arthroplasty* 2013;28(6):908-12. doi:  
18 10.1016/j.arth.2012.11.012 [published Online First: 2013/03/20]
- 19 8. Hinsley H, Nicholls A, Daines M, et al. Classification of rotator cuff tendinopathy using  
20 high definition ultrasound. *Muscles, ligaments and tendons journal* 2014;4(3):391-7.  
21 [published Online First: 2014/12/10]
- 22 9. Teefey SA, Rubin DA, Middleton WD, et al. Detection and quantification of rotator cuff  
23 tears. Comparison of ultrasonographic, magnetic resonance imaging, and arthroscopic  
24 findings in seventy-one consecutive cases. *The Journal of bone and joint surgery*  
25 *American volume* 2004;86(4):708-16. [published Online First: 2004/04/08]
- 26 10. de Jesus JO, Parker L, Frangos AJ, et al. Accuracy of MRI, MR arthrography, and  
27 ultrasound in the diagnosis of rotator cuff tears: a meta-analysis. *AJR American*  
28 *journal of roentgenology* 2009;192(6):1701-7. doi: 10.2214/ajr.08.1241 [published  
29 Online First: 2009/05/22]
- 30 11. Naqvi GA, Jadaan M, Harrington P. Accuracy of ultrasonography and magnetic resonance  
31 imaging for detection of full thickness rotator cuff tears. *Int J Shoulder Surg*  
32 2009;3(4):94-97. doi: 10.4103/0973-6042.63218
- 33 12. Smith TO, Back T, Toms AP, et al. Diagnostic accuracy of ultrasound for rotator cuff  
34 tears in adults: a systematic review and meta-analysis. *Clin Radiol* 2011;66(11):1036-  
35 48. doi: 10.1016/j.crad.2011.05.007 [published Online First: 2011/07/09]
- 36 13. Dinnes J, Loveman E, McIntyre L, et al. The effectiveness of diagnostic tests for the  
37 assessment of shoulder pain due to soft tissue disorders: a systematic review. *Health*  
38 *Technol Assess* 2003;7(29):iii, 1-166. doi: 10.3310/hta7290 [published Online First:  
39 2003/10/22]
- 40 14. Ottenheijm RP, Jansen MJ, Staal JB, et al. Accuracy of diagnostic ultrasound in patients  
41 with suspected subacromial disorders: a systematic review and meta-analysis. *Arch*  
42 *Phys Med Rehabil* 2010;91(10):1616-25. doi: 10.1016/j.apmr.2010.07.017 [published  
43 Online First: 2010/09/30]
- 44 15. Fehring EV, Sun J, VanOeveren LS, et al. Full-thickness rotator cuff tear prevalence  
45 and correlation with function and co-morbidities in patients sixty-five years and  
46 older. *Journal of shoulder and elbow surgery / American Shoulder and Elbow*  
47 *Surgeons [et al]* 2008;17(6):881-5. doi: 10.1016/j.jse.2008.05.039 [published Online  
48 First: 2008/09/09]
- 49 16. Milgrom C, Schaffler M, Gilbert S, et al. Rotator-cuff changes in asymptomatic adults.  
50 The effect of age, hand dominance and gender. *J Bone Joint Surg Br* 1995;77(2):296-  
51 8. [published Online First: 1995/03/01]
- 52 17. Moosmayer S, Smith HJ, Tariq R, et al. Prevalence and characteristics of asymptomatic  
53 tears of the rotator cuff: an ultrasonographic and clinical study. *J Bone Joint Surg Br*  
54 2009;91(2):196-200. doi: 10.1302/0301-620x.91b2.21069 [published Online First:  
55 2009/02/05]
- 56 18. Tempelhof S, Rupp S, Seil R. Age-related prevalence of rotator cuff tears in  
57 asymptomatic shoulders. *Journal of shoulder and elbow surgery / American Shoulder*  
58  
59  
60

- 1  
2  
3 *and Elbow Surgeons [et al]* 1999;8(4):296-9. doi: 10.1016/s1058-2746(99)90148-9  
4 [published Online First: 1999/09/03]
- 5 19. Reilly P, Macleod I, Macfarlane R, et al. Dead men and radiologists don't lie: a review of  
6 cadaveric and radiological studies of rotator cuff tear prevalence. *Ann R Coll Surg*  
7 *Engl* 2006;88(2):116-21. doi: 10.1308/003588406x94968 [published Online First:  
8 2006/03/23]
- 9 20. Yamamoto A, Takagishi K, Osawa T, et al. Prevalence and risk factors of a rotator cuff  
10 tear in the general population. *Journal of shoulder and elbow surgery / American*  
11 *Shoulder and Elbow Surgeons [et al]* 2010;19(1):116-20. doi:  
12 10.1016/j.jse.2009.04.006 [published Online First: 2009/06/23]
- 13 21. Schibany N, Zehetgruber H, Kainberger F, et al. Rotator cuff tears in asymptomatic  
14 individuals: a clinical and ultrasonographic screening study. *European journal of*  
15 *radiology* 2004;51(3):263-8. doi: 10.1016/s0720-048x(03)00159-1 [published Online  
16 First: 2004/08/06]
- 17 22. Yamaguchi K, Ditsios K, Middleton WD, et al. The demographic and morphological  
18 features of rotator cuff disease. A comparison of asymptomatic and symptomatic  
19 shoulders. *The Journal of bone and joint surgery American volume* 2006;88(8):1699-  
20 704. doi: 10.2106/jbjs.E.00835 [published Online First: 2006/08/03]
- 21 23. Mall NA, Kim HM, Keener JD, et al. Symptomatic progression of asymptomatic rotator  
22 cuff tears: a prospective study of clinical and sonographic variables. *The Journal of*  
23 *bone and joint surgery American volume* 2010;92(16):2623-33. doi:  
24 10.2106/jbjs.I.00506 [published Online First: 2010/11/19]
- 25 24. Needell SD, Zlatkin MB, Sher JS, et al. MR imaging of the rotator cuff: peritendinous and  
26 bone abnormalities in an asymptomatic population. *AJR American journal of*  
27 *roentgenology* 1996;166(4):863-7. doi: 10.2214/ajr.166.4.8610564 [published Online  
28 First: 1996/04/01]
- 29 25. Sher JS, Uribe JW, Posada A, et al. Abnormal findings on magnetic resonance images of  
30 asymptomatic shoulders. *The Journal of bone and joint surgery American volume*  
31 1995;77(1):10-5. doi: 10.2106/00004623-199501000-00002 [published Online First:  
32 1995/01/01]
- 33 26. Yamaguchi K, Tetro AM, Blam O, et al. Natural history of asymptomatic rotator cuff  
34 tears: a longitudinal analysis of asymptomatic tears detected sonographically. *Journal*  
35 *of shoulder and elbow surgery / American Shoulder and Elbow Surgeons [et al]*  
36 2001;10(3):199-203. doi: 10.1067/mse.2001.113086 [published Online First:  
37 2001/06/16]
- 38 27. Chandnani V, Ho C, Gerharter J, et al. MR findings in asymptomatic shoulders: a blind  
39 analysis using symptomatic shoulders as controls. *Clin Imaging* 1992;16(1):25-30.  
40 doi: 10.1016/0899-7071(92)90085-n [published Online First: 1992/01/01]
- 41 28. Minagawa H, Yamamoto N, Abe H, et al. Prevalence of symptomatic and asymptomatic  
42 rotator cuff tears in the general population: From mass-screening in one village. *J*  
43 *Orthop* 2013;10(1):8-12. doi: 10.1016/j.jor.2013.01.008 [published Online First:  
44 2014/01/10]
- 45 29. Harris JD, Pedroza A, Jones GL. Predictors of pain and function in patients with  
46 symptomatic, atraumatic full-thickness rotator cuff tears: a time-zero analysis of a  
47 prospective patient cohort enrolled in a structured physical therapy program. *Am J*  
48 *Sports Med* 2012;40(2):359-66. doi: 10.1177/0363546511426003 [published Online  
49 First: 2011/11/19]
- 50 30. Yamamoto A, Takagishi K, Kobayashi T, et al. Factors involved in the presence of  
51 symptoms associated with rotator cuff tears: a comparison of asymptomatic and  
52 symptomatic rotator cuff tears in the general population. *Journal of shoulder and*  
53 *elbow surgery / American Shoulder and Elbow Surgeons [et al]* 2011;20(7):1133-7.  
54 doi: 10.1016/j.jse.2011.01.011 [published Online First: 2011/04/02]
- 55 31. Arden NK, Griffiths GO, Hart DJ, et al. The association between osteoarthritis and  
56 osteoporotic fracture: the Chingford Study. *Br J Rheumatol* 1996;35(12):1299-304.  
57 doi: 10.1093/rheumatology/35.12.1299 [published Online First: 1996/12/01]
- 58  
59  
60



- 1  
2  
3 32. Hart DJ, Mootoosamy I, Doyle DV, et al. The relationship between osteoarthritis and  
4 osteoporosis in the general population: the Chingford Study. *Annals of the rheumatic*  
5 *diseases* 1994;53(3):158-62. doi: 10.1136/ard.53.3.158 [published Online First:  
6 1994/03/01]  
7  
8 33. Hart DJ, Spector TD. The relationship of obesity, fat distribution and osteoarthritis in  
9 women in the general population: the Chingford Study. *J Rheumatol* 1993;20(2):331-  
10 5. [published Online First: 1993/02/01]  
11  
12 34. Dawson J, Fitzpatrick R, Carr A. Questionnaire on the perceptions of patients about  
13 shoulder surgery. *J Bone Joint Surg Br* 1996;78(4):593-600. [published Online First:  
14 1996/07/01]  
15  
16 35. Dawson J, Rogers K, Fitzpatrick R, et al. The Oxford shoulder score revisited. *Archives of*  
17 *orthopaedic and trauma surgery* 2009;129(1):119-23. doi: 10.1007/s00402-007-  
18 0549-7 [published Online First: 2008/01/10]  
19  
20 36. Murphy RJ, Daines MT, Carr AJ, et al. An independent learning method for orthopaedic  
21 surgeons performing shoulder ultrasound to identify full-thickness tears of the rotator  
22 cuff. *The Journal of bone and joint surgery American volume* 2013;95(3):266-72.  
23 doi: 10.2106/jbjs.K.00706 [published Online First: 2013/02/08]  
24  
25  
26  
27  
28  
29  
30  
31  
32  
33  
34  
35  
36  
37  
38  
39  
40  
41  
42  
43  
44  
45  
46  
47  
48  
49  
50  
51  
52  
53  
54  
55  
56  
57  
58  
59  
60

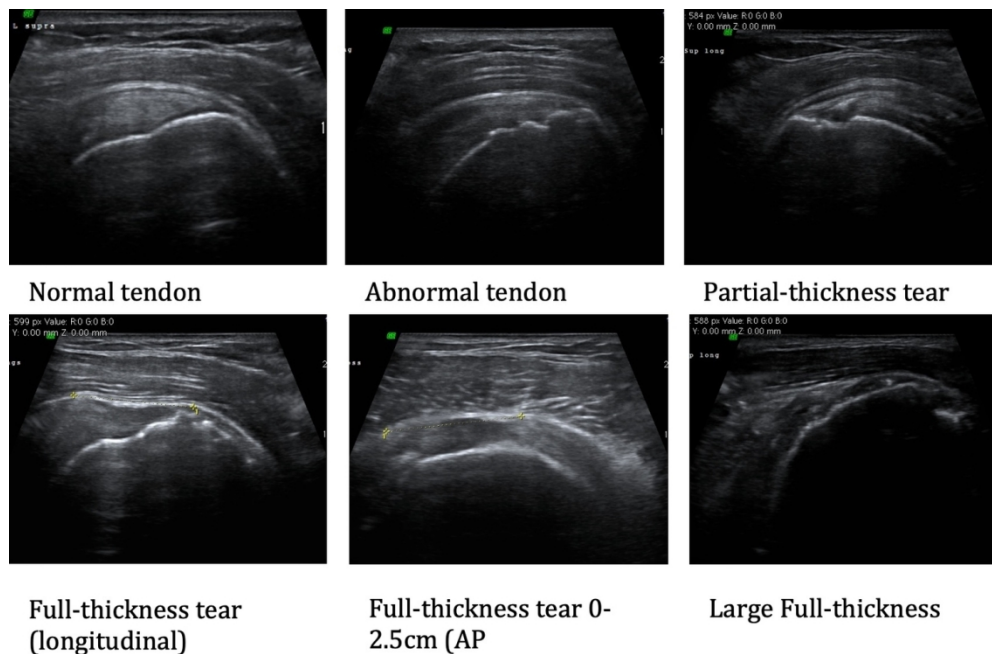

Figure 1: Ultrasound images

131x87mm (300 x 300 DPI)

1  
2  
3  
4  
5  
6  
7  
8  
9  
10  
11  
12  
13  
14  
15  
16  
17  
18  
19  
20  
21  
22  
23  
24  
25  
26  
27  
28  
29  
30  
31  
32  
33  
34  
35  
36  
37  
38  
39  
40  
41  
42  
43  
44  
45  
46  
47  
48  
49  
50  
51  
52  
53  
54  
55  
56  
57  
58  
59  
60

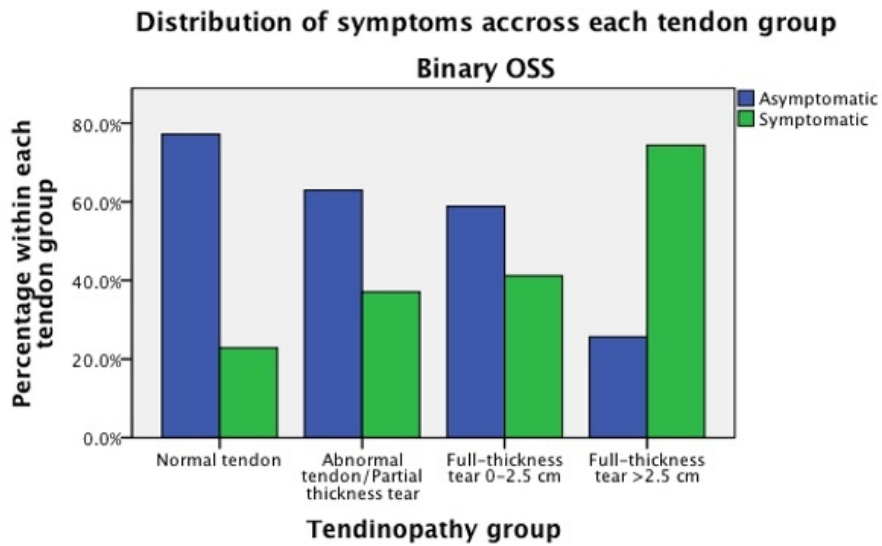

Figure 2. Distribution of symptoms across each tendon group

116x68mm (144 x 144 DPI)

## STROBE Statement—checklist of items that should be included in reports of observational studies

|                              | Item No. | Recommendation                                                                                                                                                                                                                                                                                                                                                                                                                                                                                                                                                                                                                                                                                   | Page No.                        | Relevant text from manuscript               |
|------------------------------|----------|--------------------------------------------------------------------------------------------------------------------------------------------------------------------------------------------------------------------------------------------------------------------------------------------------------------------------------------------------------------------------------------------------------------------------------------------------------------------------------------------------------------------------------------------------------------------------------------------------------------------------------------------------------------------------------------------------|---------------------------------|---------------------------------------------|
| <b>Title and abstract</b>    | 1        | (a) Indicate the study's design with a commonly used term in the title or the abstract<br>(b) Provide in the abstract an informative and balanced summary of what was done and what was found                                                                                                                                                                                                                                                                                                                                                                                                                                                                                                    | Page 1<br>Page 3                | "large cross sectional observational study" |
| <b>Introduction</b>          |          |                                                                                                                                                                                                                                                                                                                                                                                                                                                                                                                                                                                                                                                                                                  |                                 |                                             |
| Background/rationale         | 2        | Explain the scientific background and rationale for the investigation being reported                                                                                                                                                                                                                                                                                                                                                                                                                                                                                                                                                                                                             | Page 4                          |                                             |
| Objectives                   | 3        | State specific objectives, including any prespecified hypotheses                                                                                                                                                                                                                                                                                                                                                                                                                                                                                                                                                                                                                                 | page 4 lines 150-154            |                                             |
| <b>Methods</b>               |          |                                                                                                                                                                                                                                                                                                                                                                                                                                                                                                                                                                                                                                                                                                  |                                 |                                             |
| Study design                 | 4        | Present key elements of study design early in the paper                                                                                                                                                                                                                                                                                                                                                                                                                                                                                                                                                                                                                                          | Page 4 - Design - from line 157 |                                             |
| Setting                      | 5        | Describe the setting, locations, and relevant dates, including periods of recruitment, exposure, follow-up, and data collection                                                                                                                                                                                                                                                                                                                                                                                                                                                                                                                                                                  | Page 4                          |                                             |
| Participants                 | 6        | (a) <i>Cohort study</i> —Give the eligibility criteria, and the sources and methods of selection of participants. Describe methods of follow-up<br><i>Case-control study</i> —Give the eligibility criteria, and the sources and methods of case ascertainment and control selection. Give the rationale for the choice of cases and controls<br><i>Cross-sectional study</i> —Give the eligibility criteria, and the sources and methods of selection of participants<br>(b) <i>Cohort study</i> —For matched studies, give matching criteria and number of exposed and unexposed<br><i>Case-control study</i> —For matched studies, give matching criteria and the number of controls per case | Pages 4 and 5                   |                                             |
| Variables                    | 7        | Clearly define all outcomes, exposures, predictors, potential confounders, and effect modifiers. Give diagnostic criteria, if applicable                                                                                                                                                                                                                                                                                                                                                                                                                                                                                                                                                         | Page 5 - "Outcome measures"     |                                             |
| Data sources/<br>measurement | 8*       | For each variable of interest, give sources of data and details of methods of assessment (measurement). Describe comparability of assessment methods if there is more than one group                                                                                                                                                                                                                                                                                                                                                                                                                                                                                                             | Page 5                          |                                             |
| Bias                         | 9        | Describe any efforts to address potential sources of bias                                                                                                                                                                                                                                                                                                                                                                                                                                                                                                                                                                                                                                        | Page 10                         | "Strengths and weaknesses of this study"    |
| Study size                   | 10       | Explain how the study size was arrived at                                                                                                                                                                                                                                                                                                                                                                                                                                                                                                                                                                                                                                                        | Page 4                          |                                             |

Continued on next page

|                        |     |                                                                                                                                                                                                                                                                                                                                                                                                                                                                                                                                                                   |                                                                                |
|------------------------|-----|-------------------------------------------------------------------------------------------------------------------------------------------------------------------------------------------------------------------------------------------------------------------------------------------------------------------------------------------------------------------------------------------------------------------------------------------------------------------------------------------------------------------------------------------------------------------|--------------------------------------------------------------------------------|
| Quantitative variables | 11  | Explain how quantitative variables were handled in the analyses. If applicable, describe which groupings were chosen and why                                                                                                                                                                                                                                                                                                                                                                                                                                      | Page 5-6 "Data analysis"                                                       |
| Statistical methods    | 12  | (a) Describe all statistical methods, including those used to control for confounding<br>(b) Describe any methods used to examine subgroups and interactions<br>(c) Explain how missing data were addressed<br>(d) <i>Cohort study</i> —If applicable, explain how loss to follow-up was addressed<br><i>Case-control study</i> —If applicable, explain how matching of cases and controls was addressed<br><i>Cross-sectional study</i> —If applicable, describe analytical methods taking account of sampling strategy<br>(e) Describe any sensitivity analyses | SECTION 12 - See Page 5-6                                                      |
| <b>Results</b>         |     |                                                                                                                                                                                                                                                                                                                                                                                                                                                                                                                                                                   |                                                                                |
| Participants           | 13* | (a) Report numbers of individuals at each stage of study—eg numbers potentially eligible, examined for eligibility, confirmed eligible, included in the study, completing follow-up, and analysed<br>(b) Give reasons for non-participation at each stage<br>(c) Consider use of a flow diagram                                                                                                                                                                                                                                                                   | Page 6 "464 individuals (928 shoulders) were included in the study (Table 1)." |
| Descriptive data       | 14* | (a) Give characteristics of study participants (eg demographic, clinical, social) and information on exposures and potential confounders<br>(b) Indicate number of participants with missing data for each variable of interest<br>(c) <i>Cohort study</i> —Summarise follow-up time (eg, average and total amount)                                                                                                                                                                                                                                               | General cohort information described in the methods page 4                     |
| Outcome data           | 15* | <i>Cohort study</i> —Report numbers of outcome events or summary measures over time<br><i>Case-control study</i> —Report numbers in each exposure category, or summary measures of exposure<br><i>Cross-sectional study</i> —Report numbers of outcome events or summary measures                                                                                                                                                                                                                                                                                 | Pages 6-9                                                                      |
| Main results           | 16  | (a) Give unadjusted estimates and, if applicable, confounder-adjusted estimates and their precision (eg, 95% confidence interval). Make clear which confounders were adjusted for and why they were included<br>(b) Report category boundaries when continuous variables were categorized<br>(c) If relevant, consider translating estimates of relative risk into absolute risk for a meaningful time period                                                                                                                                                     | Tables 1-5, pages 6-9                                                          |

Continued on next page

|                          |    |                                                                                                                                                                            |                                                                                                     |
|--------------------------|----|----------------------------------------------------------------------------------------------------------------------------------------------------------------------------|-----------------------------------------------------------------------------------------------------|
| Other analyses           | 17 | Report other analyses done—eg analyses of subgroups and interactions, and sensitivity analyses                                                                             | Not applicable                                                                                      |
| <b>Discussion</b>        |    |                                                                                                                                                                            |                                                                                                     |
| Key results              | 18 | Summarise key results with reference to study objectives                                                                                                                   | Page 9                                                                                              |
| Limitations              | 19 | Discuss limitations of the study, taking into account sources of potential bias or imprecision. Discuss both direction and magnitude of any potential bias                 | Page 10 "Strengths and limitations of the study"                                                    |
| Interpretation           | 20 | Give a cautious overall interpretation of results considering objectives, limitations, multiplicity of analyses, results from similar studies, and other relevant evidence | Page 11 "Meaning of the study and unanswered questions"                                             |
| Generalisability         | 21 | Discuss the generalisability (external validity) of the study results                                                                                                      | End of Page 11 - "This epidemiological study clearly demonstrates association but not causality..." |
| <b>Other information</b> |    |                                                                                                                                                                            |                                                                                                     |
| Funding                  | 22 | Give the source of funding and the role of the funders for the present study and, if applicable, for the original study on which the present article is based              | Page 2 "role of the funding body"                                                                   |

\*Give information separately for cases and controls in case-control studies and, if applicable, for exposed and unexposed groups in cohort and cross-sectional studies.

**Note:** An Explanation and Elaboration article discusses each checklist item and gives methodological background and published examples of transparent reporting. The STROBE checklist is best used in conjunction with this article (freely available on the Web sites of PLoS Medicine at <http://www.plosmedicine.org/>, Annals of Internal Medicine at <http://www.annals.org/>, and Epidemiology at <http://www.epidem.com/>). Information on the STROBE Initiative is available at [www.strobe-statement.org](http://www.strobe-statement.org).

# BMJ Open

**Prevalence of rotator cuff tendon tears and symptoms in a Chingford general population cohort, and the resultant impact on United Kingdom health services: A cross-sectional observational study.**

|                                 |                                                                                                                                                                                                                                                                                                                                                                                                                                                                                                                            |
|---------------------------------|----------------------------------------------------------------------------------------------------------------------------------------------------------------------------------------------------------------------------------------------------------------------------------------------------------------------------------------------------------------------------------------------------------------------------------------------------------------------------------------------------------------------------|
| Journal:                        | <i>BMJ Open</i>                                                                                                                                                                                                                                                                                                                                                                                                                                                                                                            |
| Manuscript ID                   | bmjopen-2021-059175.R1                                                                                                                                                                                                                                                                                                                                                                                                                                                                                                     |
| Article Type:                   | Original research                                                                                                                                                                                                                                                                                                                                                                                                                                                                                                          |
| Date Submitted by the Author:   | 16-Mar-2022                                                                                                                                                                                                                                                                                                                                                                                                                                                                                                                |
| Complete List of Authors:       | Hinsley, Hannah; University of Oxford Nuffield Department of Orthopaedics Rheumatology and Musculoskeletal Sciences Ganderton, Charlotte; Swinburne University of Technology Faculty of Health Arts and Design, Nursing and Allied Health Arden, Nigel; University of Oxford , University of Oxford Nuffield Department of Orthopaedics Rheumatology and Musculoskeletal Sciences, Carr, Andrew; University of Oxford, University of Oxford Nuffield Department of Orthopaedics Rheumatology and Musculoskeletal Sciences, |
| <b>Primary Subject Heading</b>: | Public health                                                                                                                                                                                                                                                                                                                                                                                                                                                                                                              |
| Secondary Subject Heading:      | Diagnostics, Evidence based practice, Sports and exercise medicine                                                                                                                                                                                                                                                                                                                                                                                                                                                         |
| Keywords:                       | Shoulder < ORTHOPAEDIC & TRAUMA SURGERY, Ultrasonography < OBSTETRICS, Musculoskeletal disorders < ORTHOPAEDIC & TRAUMA SURGERY, Diagnostic radiology < RADIOLOGY & IMAGING                                                                                                                                                                                                                                                                                                                                                |
|                                 |                                                                                                                                                                                                                                                                                                                                                                                                                                                                                                                            |

SCHOLARONE™  
Manuscripts



I, the Submitting Author has the right to grant and does grant on behalf of all authors of the Work (as defined in the below author licence), an exclusive licence and/or a non-exclusive licence for contributions from authors who are: i) UK Crown employees; ii) where BMJ has agreed a CC-BY licence shall apply, and/or iii) in accordance with the terms applicable for US Federal Government officers or employees acting as part of their official duties; on a worldwide, perpetual, irrevocable, royalty-free basis to BMJ Publishing Group Ltd ("BMJ") its licensees and where the relevant Journal is co-owned by BMJ to the co-owners of the Journal, to publish the Work in this journal and any other BMJ products and to exploit all rights, as set out in our [licence](#).

The Submitting Author accepts and understands that any supply made under these terms is made by BMJ to the Submitting Author unless you are acting as an employee on behalf of your employer or a postgraduate student of an affiliated institution which is paying any applicable article publishing charge ("APC") for Open Access articles. Where the Submitting Author wishes to make the Work available on an Open Access basis (and intends to pay the relevant APC), the terms of reuse of such Open Access shall be governed by a Creative Commons licence – details of these licences and which [Creative Commons](#) licence will apply to this Work are set out in our licence referred to above.

Other than as permitted in any relevant BMJ Author's Self Archiving Policies, I confirm this Work has not been accepted for publication elsewhere, is not being considered for publication elsewhere and does not duplicate material already published. I confirm all authors consent to publication of this Work and authorise the granting of this licence.



1  
2  
3 1 **Prevalence of rotator cuff tendon tears and symptoms in a Chingford general population**  
4 2 **cohort, and the resultant impact on United Kingdom health services: A cross-sectional**  
5 3 **observational study.**  
6 4

7 4  
8 5 Hannah Hinsley<sup>1\*</sup>, Charlotte Ganderton<sup>2</sup>, Nigel Arden<sup>1^</sup>, Andrew Carr<sup>1^</sup>

9 6 <sup>1</sup> The Nuffield Department of Orthopaedics, Rheumatology and Musculoskeletal Sciences, University  
10 7 of Oxford, Oxford, United Kingdom  
11

12 8 <sup>2</sup> Department of Health Sciences and Biostatistics, Faculty of Health Arts and Design, Swinburne  
13 9 University of Technology, Hawthorn, Victoria, Australia  
14

15 10  
16 11 **Author information:**

17 12 Dr Hannah Hinsley; Orthopaedic Surgeon, ARUK orthopaedic clinical research fellow, The Nuffield  
18 13 Department of Orthopaedics, Rheumatology and Musculoskeletal Sciences, University of Oxford,  
19 14 United Kingdom; [hannah.hinsley@nhs.net](mailto:hannah.hinsley@nhs.net)  
20 15

21 16 <sup>^</sup>Professor Nigel Arden; Lead of Musculoskeletal Epidemiology, Deputy Director Centre for Sport,  
22 17 Exercise & Osteoarthritis Research Versus Arthritis and Fellow at the Lady Margaret Hall at The  
23 18 Nuffield Department of Orthopaedics, Rheumatology and Musculoskeletal Sciences, University of  
24 19 Oxford, United Kingdom; [nigel.arden@ndorms.ox.ac.uk](mailto:nigel.arden@ndorms.ox.ac.uk)  
25 20

26 21 Dr Charlotte Ganderton, Physiotherapist and Lecturer at the Department of Health Sciences and  
27 22 Biostatistics, Faculty of Health Arts and Design, Swinburne University of Technology, Hawthorn,  
28 23 Victoria, Australia, [cganderton@swin.edu.au](mailto:cganderton@swin.edu.au)  
29 24

30 25 <sup>^</sup>Professor Andrew Carr, Professor of Orthopaedics at The Nuffield Department of Orthopaedics,  
31 26 Rheumatology and Musculoskeletal Sciences, University of Oxford, United Kingdom; Director of the  
32 27 Botnar Research Centre; [andrew.carr@ndorms.ox.ac.uk](mailto:andrew.carr@ndorms.ox.ac.uk)  
33 28

34 29 \*Corresponding author: Dr Hannah Hinsley

35 30 Contact address: Nuffield Department of Orthopaedics, Rheumatology and Musculoskeletal Sciences,  
36 31 NIHR Biomedical Research Unit, Botnar Research Centre, University of Oxford, Nuffield  
37 32 Orthopaedic Centre, Windmill Road, OX3-7LD Oxford, United Kingdom  
38 33

39 34 <sup>^</sup>Senior co-authors  
40 35  
41 36  
42 37  
43  
44  
45  
46  
47  
48  
49  
50  
51  
52  
53  
54  
55  
56  
57  
58  
59  
60

1  
2  
3 38 **Contributors:** HH, NA, AC were responsible for planning, conducting, and reporting the work  
4 39 described in the article. HH and CG drafted the manuscript. All authors approved the final version of  
5 40 the article. HH, NA and AC had access to all the data in the study and can take responsibility for the  
6 41 integrity of the data and the accuracy of the data analysis. HH is guarantor. The corresponding author  
7 42 attests that all listed authors meet authorship criteria and that no others meeting the criteria have been  
8 43 omitted. All authors fully acknowledge the contribution of the patients that participated in this study.  
9 44 No authors are employees of the National Institutes of Health.

10  
11  
12  
13 45 **Transparency Statement:** The lead author (the manuscript's guarantor) affirms that the manuscript  
14 46 is an honest, accurate, and transparent account of the study being reported; that no important aspects  
15 47 of the study have been omitted; and that any discrepancies from the study as planned (and, if relevant,  
16 48 registered) have been explained.

17 49  
18  
19 50 **Role of the funding source:** Arthritis Research United Kingdom awarded the project £190,361.00 to  
20 51 cover costs to completion. Researchers were independent from the funding body. All authors, external  
21 52 and internal, had full access to all the data (including statistical reports and tables) in the study and  
22 53 can take responsibility for the integrity of the data and the accuracy of the data analysis.

23 54  
24 55 **Competing interests:** No competing interests

25 56  
26 57 **Ethics approval:** Outer North East London Research Ethics Committee (formerly Barking and  
27 58 Havering and Waltham Forest RECs), LREC (R&WF) reference ID = 96.

#### 28 59 29 60 **Patient and public involvement**

30 61 We would like to thank all the participants of the Chingford Women Study for their time.  
31 62 We would also like to thank Mrs Maxine Daniels and Dr Alan Hakim for their time and dedication,  
32 63 and both Mr Alex Nichols and Mr Michael Daines for their assistance with data collection and Dr  
33 64 Gemma Wallis for her assistance with data analysis.

#### 34 65 35 66 **Acknowledgement**

36 67 Thank you to Dr Gemma Wallis, Statistician, for reviewing statistical analysis processes used in this  
37 68 study.

38 69  
39 70 **Data sharing:** For information about the Chingford 1000 Women Study,  
40 71 email [chingford@ndorms.ox.ac.uk](mailto:chingford@ndorms.ox.ac.uk).

41 72  
42 73 **Dissemination to participants and related patient and public communities:** We will disseminate  
43 74 our findings to patient organisations and media outlets.

44 75  
45 76 **Provenance and peer review:** Not commissioned; peer reviewed at Orthopaedic meetings.  
46 77

## 78 Structured Abstract

### 80 Objectives:

81 To define the population prevalence of rotator cuff tears and test their association with pain and  
82 function loss; determine if severity symptom correlates with tear stage severity, and quantify the  
83 impact of symptomatic rotator cuff tears on primary health care services, in a general population  
84 cohort of women.

### 86 Design:

87 Cross sectional observational study.

### 89 Participants:

90 Individuals were part of the Chingford 1000 women cohort, a 20-year-old longitudinal population  
91 study comprising 1003 women aged between 64 and 87, and representative of the population of the  
92 UK.

### 94 Main outcome measures:

95 Rotator cuff pathology prevalence on ultrasound, shoulder symptoms using the Oxford shoulder  
96 score, and resultant number of GP consultations.

### 98 Results:

99 The population prevalence of full-thickness tears was 22.2%, which increased with age ( $p=0.004$ ),  
100 and whether it was the dominant arm (RR 1.64, OR 1.58, 95% CI 1.07-2.33,  $p=0.021$ ).

101 Although 48.4% of full-thickness tears were asymptomatic there was an association between rotator  
102 cuff tears and patient reported symptoms. Individuals with at least one full-thickness tear were 1.97  
103 times more likely, than those with bilateral normal tendons (OR 3.53, 95%CI 2.00-5.61,  $p<0.001$ ), to  
104 have symptoms. Severity of symptoms was not related to the severity of the pathology until tears are  
105  $>2.5\text{cm}$  ( $p=0.009$ ).

106 In the cohort 8.9% had seen their GP with shoulder pain and a full-thickness rotator cuff tear, 18.8%  
107 with an abnormality and 29.3% overall.

### 111 Conclusion:

112 Rotator cuff tears are common, and primary care services are heavily impacted. As 50% of tears  
113 remain asymptomatic, future research may investigate the cause of pain and whether different  
114 treatment modalities, aside from addressing the pathology, need further investigation.

### 116 Trial Registration:

117 The local ethics committee approved the study (Outer North East London Research Ethics Committee  
118 (formerly Barking and Havering and Waltham Forest RECs), LREC (R&WF) reference ID = 96).

### 120 Strengths and limitations of this study:

- 121 • Pain on the Oxford Shoulder Score is associated with the presence of rotator cuff tendon pain,  
122 but not the extent of structural pathology identified on ultrasound imaging.
- 123 • Rotator cuff pathology and associated symptoms pose a large burden on the healthcare system  
124 with 28.8% of people seeking GP consultation for their shoulder pain.
- 125 • This epidemiological study demonstrates association but not causality and leaves unanswered  
126 questions as to what additional factors contribute to shoulder pain.

## 127 **Introduction**

### 128 **Background**

129 Musculoskeletal pain is one of the most common sources of disability in the Western world<sup>1</sup>. The  
130 shoulder is the third most common site of musculoskeletal disease<sup>2</sup>, with an estimated 20% of the  
131 population reporting pain at any given time<sup>3</sup>. Pain related to rotator cuff tears are estimated to account  
132 for 30-40% of these shoulder complaints<sup>4</sup>, causing high levels of disability and associated healthcare  
133 costs<sup>5-7</sup>. High-definition ultrasound is the current gold standard for the detection of full-thickness  
134 tears, and is a valid tool to detect an abnormal tendon enthesis<sup>8</sup>, but has poorer accuracy to detect  
135 partial-thickness tears<sup>8-14</sup>. Full thickness tears are recognised to be common and associated with  
136 increasing age<sup>15-18</sup>, however prevalence in symptomatic and asymptomatic shoulders varies widely  
137 across cadaveric<sup>19</sup>, radiological<sup>19</sup> and retrospective cohort studies<sup>16-18 20-28</sup>. Furthermore, the presence  
138 of selection bias in studies undertaken in rotator cuff tendon tears<sup>16-28</sup>, has meant population-based  
139 studies available, are not representative of Western demographics. Thus, research in this area may  
140 lead to a better understanding of the natural history of rotator cuff tears.

141  
142 Clinical manifestations of rotator cuff tears are varied<sup>15 17 22 26 28</sup>, and detection of pathology and its  
143 relationship to clinical symptoms is not well established. Many tears are asymptomatic but are  
144 thought to be a risk of developing symptoms with time<sup>26</sup>. Although larger tears are more likely to be  
145 painful, there is also no evidence to suggest that they have a greater severity of symptoms than  
146 smaller tears<sup>29</sup>. One population cohort from a mountainous region has suggested that only a third of  
147 full-thickness tears were painful, of which symptoms were more prevalent in the dominant arm<sup>30</sup>.  
148 However, all studies investigating symptom association have looked at isolated shoulders, and have  
149 not considered that the individual, has two shoulders. It is therefore plausible that there may be the  
150 presence of other physical or psychological factors unique to the individual, rather than the specific  
151 shoulder, that may have an influence on symptom presentation, rather than solely the underlying  
152 pathology. To date, no study has explored the association between rotator cuff tears, pain and  
153 functional loss in a general population cohort, or how these impact on a health service.

### 155 **Objectives**

156 This study aims to: (i) describe the population prevalence of different stages of rotator cuff tear in a  
157 general population cohort of women; (ii) determine what proportion of rotator cuff tears are  
158 symptomatic, and whether the severity of symptoms correlates with tear stage severity; (iii) identify  
159 individual influences on the likelihood of symptoms and (iv) quantify the impact of symptomatic  
160 rotator cuff tears on primary health care services.

### 163 **Methods**

#### 164 *Study Design, Setting and Participants (including study size)*

165 Participants in this cross-sectional observational study were involved in the larger Chingford 1000  
166 women study. This is an ethically approved well described prospective population-based longitudinal  
167 study of osteoarthritis and osteoporosis comprising 1003 white Caucasian women, derived from the  
168 register of a large general practice in Chingford, North London<sup>31-33</sup>. The cohort was recruited in 1989  
169 where the women were aged 44-67. They have been characterised as representative of women in the  
170 UK general population with respect to weight, height, and smoking characteristics. The cohort has  
171 been subsequently listed by the National Institute for Health Research as an important  
172 epidemiological recourse. This study took place at the Chingford 20 year follow up visit where 516 of  
173 the original 1003 cohort attended (158 women had died, 111 were unable to attend, 218 had moved

away or been lost to follow up). A musculoskeletal assessment, including the Oxford shoulder score, and shoulder ultrasound examination was performed on both shoulders (left and right) in 463 women (Out of the 515, 52 attended but did not have a shoulder assessment due to lack of assessor, and 1 did not complete an Oxford shoulder score). The local ethics committee approved the study and consent was obtained from each woman (Outer North East London Research Ethics Committee (formerly Barking and Havering and Waltham Forest RECs), LREC (R&WF) reference ID = 96).

#### *Variables and data sources:*

Participant characteristics of age, height, weight, hand dominance, and a self-reported musculoskeletal questionnaire filled out a priori (including the Oxford Shoulder Score<sup>34 35</sup>, body chart and questions regarding previous pain, treatments and whether medical advice has been sought), were all collected at baseline. A musculoskeletal ultrasound assessment on bilateral shoulders was then undertaken using a fixed SOPP (standard operating procedure protocol).

The ultrasound examination of the 464 women was completed by two orthopaedic assessors and performed using a GE voluson i-portable ultrasound machine with a 10-16MHz linear probe. Ultrasound training and appropriate validation studies<sup>36</sup> were completed as recommended by the BESS focus group - 343 individuals were scanned by assessor 1 and 121 individuals by assessor two. Appropriate inter and intra-rater reliability studies were performed and showed high reproducibility (weighted kappa 0.92  $p < 0.001$ ) and no difference in reporting trends ( $p = 0.08$ ). The ultrasound protocol was derived according to the recommendations of the Nuffield Orthopaedic Centre Musculoskeletal radiology department. Tendons were classified into one of four working groups based upon ultrasound measurements as validated by Hinsley et al.<sup>8</sup>: normal tendon; abnormal tendon and partial thickness tear; single tendon full-thickness tears (0-2.5cm) and multi-tendon full-thickness tears ( $> 2.5$ cm) (Figure 1).

#### Figure 1: Tendon classification on ultrasound

Figure 1 legend: (i) normal tendon: normal homogenous appearance throughout with no abnormality at the enthesis; (ii) abnormal tendon: loss of homogenous appearance and abnormal ragged enthesis +/- enlarged fluid-filled bursa or partial thickness tear; (iii) full thickness tear (0-2.5cm): lucent patch through the full thickness of the tendon with tear size defined as its width in the sagittal plane (iv) full-thickness tears ( $> 2.5$ cm): Evidence of large defect or no evidence of tendon tissue present.

#### *Quantitative variables and Statistical methods*

All statistics were performed using IBM SPSS Statistics version 22 (IBM, Armonk, NY, USA). Age, BMI, hand dominance, and symptom presence were compared across the four different tendon pathology groups. Wilcoxon rank sum test, one-way ANOVA, and chi-squared tests were used for non-normal, normal and categorical data respectively.

Population prevalence of full-thickness tears was defined as having at least one unilateral full-thickness tear. Population prevalence of tendon abnormalities was defined as having at least a unilateral tendon abnormality ranging from abnormal enthesis to a full thickness tear. This was calculated by summing the percentage with unilateral tears and the percentage with bilateral tears for each age group.

Symptoms were defined using the Oxford shoulder score<sup>34 35</sup>. This was chosen for what the authors believed represented the best content and construct validity as applicable to the study as it covers a range of symptoms (both relating to pain and function) over a 4-week time period, and also allows

discriminate ability. Binary symptoms were defined by dichotomising the Oxford shoulder score<sup>34 35</sup> where, any non-perfect score ( $\leq 47/48$ ) was classified as symptomatic. The cut off at 47 was used to determine symptoms as we were not looking for significant changes, rather, the ability to detect any individual who was unable to perform an activity to the full, or who has pain at any given time. This showed good correlation with binary pain questions and the NRS and was not statistically different to the results using a 3-point gap. Where questions are pain specific, the four pain specific questions of the OSS were used as a sub-scale. In symptomatic participants, the full OSS scale, scored on a 0-48 point scale, was used to define symptom severity. A Chi<sup>2</sup> test was used to determine any difference between tendon pathology groups. Multivariate binary logistic regression was used to adjust for the potential confounders age, BMI and hand dominance determined a priori. To account for a high positive skew of the OSS data when determining symptom severity, all asymptomatic shoulders were removed, and a logarithmic transformation of the inverse OSS was used to create a normal distribution. Symptom severity in symptomatic shoulders was compared across tendon pathology groups using a 1-way ANOVA. Multivariate linear regression was used to adjust for potential confounders age, and hand dominance determined a priori.

## 236 Results

### 237 Participants and descriptive data

238 464 individuals (928 shoulders) were included in the study (Table 1). The distribution of age across  
239 each tendon pathology group was significantly different ( $p<0.001$ ), with age increasing in accordance  
240 with tear severity. There was a statistical difference in the proportion of dominant and non-dominant  
241 arms in each tendon pathology group ( $p=0.033$ ), with there being significantly more non-dominant  
242 arms in the normal tendon group ( $p=0.010$ ), and significantly more dominant arms in those with full-  
243 thickness tears ( $p=0.026$ ). There were no between-group differences in BMI ( $p=0.080$ ).

244  
245 Table 1. Demographics of shoulders included in the study

|                                | Frequency | %     | Median age | Mean BMI | Dominant arm (%) |
|--------------------------------|-----------|-------|------------|----------|------------------|
| Normal                         | 510       | 55.0% | 70         | 27.5     | 46.1%            |
| Abnormal/ Partial tear         | 294       | 31.7% | 73         | 28.0     | 52.7%            |
| Full-thickness tears (0-2.5cm) | 85        | 9.2%  | 74         | 27.9     | 58.8%            |
| Full-thickness tears (>2.5cm)  | 39        | 4.2%  | 74         | 29.6     | 61.5%            |
| All                            | 928       | 100%  | 71         | 27.8     | 50%              |

### 246 Outcome data and main results

#### 247 Prevalence of rotator cuff tendon pathology

248 The population prevalence of having at least one full-thickness tear was 22.2% (4.5% bilateral). For  
249 age groups 60-69, 70-79 and 80-89 these were 14.9%; 25.9% and 29% respectively, and bilateral tears  
250 2.3%; 5.9% and 5.8% respectively. The difference in prevalence between age groups was statistically  
251 different ( $p<0.001$ ).

252  
253 The population prevalence of having at least a unilateral tendon pathology or tear was 59.5% (30.6%  
254 bilateral). For age groups 60-69, 70-79 and 80-89 these were 51.5%; 61.8% and 72.5% respectively,  
255 and bilateral tears 24.6%; 32.3% and 40.6% respectively. The difference in population prevalence  
256 between age groups was statistically significant ( $p<0.001$ ).

257

Table 2 shows the prevalence of rotator cuff tendinopathy in the dominant and non-dominant arms in age deciles. The distribution of tendinopathy differed between age groups (Dominant arm  $p=0.002$ ; non-dominant arm  $p=0.037$ ) with more pathology found in older age groups, and in the dominant compared to non-dominant arms ( $p=0.004$ ). There was no difference in prevalence according to BMI group. The relative risk of full-thickness tear was 1.64 (OR 1.580, 95%CI 1.073-2.326,  $p=0.021$ ) in the dominant compared to non-dominant arm. For those aged 70-79 it was 2.072 (OR 2.026, 95%CI 1.286-3.190,  $p=0.002$ ), and aged 80-89 was 2.293 (OR 2.256, 95%CI 1.264-4.027,  $p=0.006$ ), compared to those aged 60-69.

Table 2. Prevalence of rotator cuff tendon pathology according to age decile and arm dominance

|                                        | Age Group     |       |               |       |              |       |               |       |
|----------------------------------------|---------------|-------|---------------|-------|--------------|-------|---------------|-------|
|                                        | 60-69 (n=175) |       | 70-79 (n=220) |       | 80-89 (n=69) |       | Total (n=464) |       |
|                                        | Count         | %     | Count         | %     | Count        | %     | Count         | %     |
| <b>Dominant arm</b>                    |               |       |               |       |              |       |               |       |
| Normal tendon                          | 102           | 58.3% | 111           | 50.5% | 22           | 31.9% | 235           | 50.6% |
| Abnormal tendon/Partial thickness tear | 54            | 30.9% | 67            | 30.5% | 34           | 49.3% | 155           | 33.4% |
| Full-thickness tear 0-2.5 cm           | 14            | 8.0%  | 27            | 12.3% | 9            | 13.0% | 50            | 10.8% |
| Full-thickness tear >2.5 cm            | 5             | 2.9%  | 15            | 6.8%  | 4            | 5.8%  | 24            | 5.2%  |
| <b>Non-dominant arm</b>                |               |       |               |       |              |       |               |       |
| Normal tendon                          | 115           | 65.7% | 122           | 55.5% | 38           | 55.1% | 275           | 59.3% |
| Abnormal tendon/Partial thickness tear | 49            | 28.0% | 70            | 31.8% | 20           | 29.0% | 139           | 30.0% |
| Full-thickness tear 0-2.5 cm           | 10            | 5.7%  | 18            | 8.2%  | 7            | 10.1% | 35            | 7.5%  |
| Full-thickness tear >2.5 cm            | 1             | 0.6%  | 10            | 4.5%  | 4            | 5.8%  | 15            | 3.2%  |

268

### 269 Association of symptoms (all shoulders)

270 An analysis of symptom association was completed in 926 shoulders (463/464 participants due to loss  
271 of one questionnaire). There were 289 (31.2%) symptomatic shoulders according to a dichotomised  
272 OSS. The presence of symptoms was statistically significant between tendon groups ( $p<0.001$ );  
273 51.6% of all full-thickness tears were symptomatic. There was no difference in age, BMI or arm  
274 dominance between symptomatic or asymptomatic shoulders. The relative risks of having symptoms  
275 compared to those with a reported normal tendon were as follows: Abnormal/Partial tears 1.969 (OR  
276 1.991, 95%CI 1.454-2.727); full-thickness tears 0-2.5cm 2.203 (OR 2.366, 95%CI 1.465-3.891); and  
277 full-thickness tears >2.5cm 4.718 (OR 9.800, 95%CI 4.638-20.705). All were significant ( $p<0.001$ )  
278 with the model correctly predicting 71% of symptom outcomes correctly. The distribution of  
279 symptoms across each tendon group is shown in Figure 2.

280

281 Figure 2. Distribution of symptoms across each tendon group

### 282 Symptom severity

283 For the 289 symptomatic shoulders the full OSS was reported (Table 3). Median age was significantly  
284 different between groups ( $p=0.047$ ), with age increasing with tear stage severity. No statistically  
285 significant between-group differences in BMI were identified, nor any within-group differences for  
286 arm dominance.

287

288 Table 3. Symptom severity demographics

|                              | N   | Median age | Mean BMI | Dominant arm (%) |
|------------------------------|-----|------------|----------|------------------|
| Normal                       | 116 | 70         | 28.3     | 46.6%            |
| Abnormal/Partial tear        | 109 | 73         | 28.4     | 54.1%            |
| Full-thickness tears 0-2.5cm | 35  | 72         | 28.1     | 62.9%            |
| Full-thickness tears >2.5cm  | 29  | 73         | 30.3     | 58.6%            |
| All                          | 289 | 71         | 28.5     | 50%              |

289

290

291

292

293

294

295

296

297

298

299

300

301

302

303

304

305

306

307

308

309

310

311

312

313

314

315

316

317

318

319

320

321

322

323

324

325

326

327

328

329

330

The mean OSS for symptomatic shoulders was 41.8. For normal tendons this was 42.5, abnormal tendons, 42.1; full-thickness tears (0-2.5cm), 40.2; and full-thickness tears (>2.5cm), 38.4. There was a statistical difference between the groups (1 way ANOVA  $p=0.030$ ). Linear regression analysis after adjustment for age, BMI, and hand dominance (no interactions identified), showed that the only significant difference in OSS scores was between normal tendons (mean OSS 42.5) and large full-thickness tears (OSS 38.3),  $p=0.009$ , power 0.75 (overall model  $p=0.007$ , power 0.892).

#### *Association of symptoms (individuals)*

Table 4 shows the relationship between the individual, presence of full-thickness rotator cuff tear and the likelihood of symptoms. A clustering effect of bilateral symptoms or lack thereof is present, irrespective of the underlying pathology. After adjustment for age and BMI, compared to those with bilaterally normal shoulders the relative risk of having at least one symptomatic shoulder in the presence of a full thickness rotator cuff tear is 1.49 (OR 1.867, 95%CI 1.200-2.904), and 1.97 (OR 3.352, 95%CI 2.003-5.609) in the presence of at least a unilateral abnormality or cuff tear.

Table 4. Distribution of individual shoulder symptoms according to the presence of full-thickness tears

|                  | No Symptoms | Unilateral Symptoms | Bilateral Symptoms | Total |
|------------------|-------------|---------------------|--------------------|-------|
| Bilateral No FTT | 226         | 71                  | 63                 | 360   |
| Unilateral FTT   | 33          | 25                  | 24                 | 82    |
| Bilateral FTT    | 10          | 3                   | 8                  | 21    |
| Total            | 269         | 99                  | 95                 | 463   |

307

308

309

310

311

312

313

314

315

316

317

318

319

320

321

322

323

324

325

326

#### *Shoulder pain and use of primary care health services*

Table 5 shows the proportion of individuals with shoulder pain, past or present, seeking medical advice. The likelihood of seeking medical attention for shoulder pain was statistically different between each pathology group (Chi<sup>2</sup> test  $p=0.005$ ) reflecting the increasing likelihood of pain. However, of those with pain the likelihood of seeking medical attention was not statistically different between groups (Chi<sup>2</sup> test  $p=0.179$ ). Overall, 28.3% (131/463) of all individuals had at some stage seen their GP for shoulder pain. In this cohort, 8.9% (41/463) had seen their GP with shoulder pain and a full-thickness tendon tear and 18.8% (87/463) had seen their GP with an abnormal tendon or full thickness tear.

A multivariable regression model using all individuals was used to predict the likelihood of attending a GP for shoulder pain. The presence of at least one full-thickness tear had a relative risk of 1.63 (OR 2.179, 95%CI 1.282-3.703) compared to those with normal tendons of attending the GP. There was



no statistical difference in relative risk of those with any tendon abnormality compared to those with bilaterally normal shoulders.

Table 5. Proportion of individuals seeking medical advice

|                                                  | Present symptoms<br>(either shoulder) |                | Past or Present<br>symptoms<br>(either shoulder) |                 | All individuals<br>% seen GP |
|--------------------------------------------------|---------------------------------------|----------------|--------------------------------------------------|-----------------|------------------------------|
|                                                  | %                                     | % seen GP      | %                                                | % seen GP       |                              |
| All individuals<br>(n=463)                       | 41.9<br>(n=194)                       | 44.8<br>(n=87) | 55.7<br>(n=258)                                  | 50.8<br>(n=131) | 28.3<br>(n=131)              |
| Bilaterally normal<br>tendons<br>(n=187)         | 29.9<br>(n=56)                        | 41.1<br>(n=23) | 48.1<br>(n=90)                                   | 48.9<br>(n=44)  | 23.5<br>(n=44)               |
| At least one abnormality<br>(no tear)<br>(n=173) | 45.1<br>(n=78)                        | 41.0<br>(n=32) | 57.2<br>(n=99)                                   | 46.5<br>(n=46)  | 26.6<br>(n=46)               |
| At least one full-<br>thickness tear<br>(n=103)  | 58.3<br>(n=60)                        | 53.3<br>(n=32) | 67.0<br>(n=69)                                   | 59.4<br>(n=41)  | 39.8<br>(n=41)               |

## Discussion

### Key results

Using a large general population cohort of women aged 65-84 years, this study has reported on the prevalence of rotator cuff pathology, the association of pathology to symptoms and uniquely the consequential impact on health services.

The prevalence of rotator cuff pathology has been well reported in the literature, and this general population study, supports previous findings. Prevalence was found to increase with every decile of age, and the relative risk of having a full thickness tear increased more than two-fold between the 65-69 and >80 age groups, suggesting age related change<sup>18</sup>. Overall, the prevalence of at least a unilateral full thickness tear was 22%. The dominant arm was 1.64 times likely to be affected, inferring that the presence of pathology may exist in shoulders with higher cumulative loading.

The relative risk of having symptomatic pathology (worsening OSS scores) increased with tear stage severity, though the severity of symptoms did not increase accordingly. Although larger tear size increased the likelihood of symptom presence, 48.4% of full-thickness rotator cuff tears remained asymptomatic.

The burden of musculoskeletal shoulder pain on health services is large, with 28.3% of individuals in this general population cohort having at some point sought medical advice for shoulder symptoms. This is the first study to look at the impact of rotator cuff pathology on the impact on the health services. Although on average only 50% of individuals with symptomatic rotator cuff tendon pathology (tendinopathy) will seek medical advice, the impact remains significant. Overall, almost 10% of individuals in the general population have sought medical advice for shoulder symptoms in the presence of a full-thickness tear, and almost 20% of the population for any tendon abnormality.

1  
2  
3 350 The major strength of this study is that it uses a large general population cohort, and therefore not  
4 351 subject to selection bias. The cohort was originally investigated with the primary focus of  
5 352 osteoporosis, and not shoulder symptoms, thus any continued participation is not driven by shoulder  
6 353 symptoms.  
7 354

### 9 355 **Limitations (including bias)**

10 356 The cohort can only comment on associations in women aged between 65 and 84, but as previous  
11 357 studies have found no relationship between symptoms and age or sex<sup>23,30</sup>, this will not bias the  
12 358 results. Potential survival bias is introduced by the cohort being in its 20<sup>th</sup> year. If a greater proportion  
13 359 of individuals with pathology were lost to follow up this may cause us to under-estimate any  
14 360 association, however, no known associations exist in the literature between rotator cuff tears and other  
15 361 medical co-morbidities. Furthermore, as the prime goal of the cohort was not to investigate shoulder  
16 362 symptoms, this had no impact on continued study participation. Furthermore, only 463/516  
17 363 individuals that attended the year-20 study underwent a shoulder examination due to lack of an  
18 364 examiner being present at these follow up appointments. However, the age and BMI of the groups  
19 365 was not statistically different to the full cohort.  
20 366

21 367 Bias arising from having two examiners was ameliorated by two inter-observer reproducibility studies  
22 368 that demonstrated minimal effect of inter-observer analytic bias. Furthermore, to demonstrate  
23 369 ultrasound-scanning accuracy a learning curve study was undertaken a priori by both examiners,  
24 370 which demonstrated scanning accuracies comparable to those quoted in the literature. Inter-observer  
25 371 studies also demonstrated good reproducibility reducing analytic bias. Potential risk of overreporting  
26 372 pathology in symptomatic presentations is acknowledged as the assessor (ultrasonographer) was  
27 373 unblinded to the OSS result, as for pragmatic reasons due to lack of assessors, both assessments were  
28 374 carried out by the same individual. To overcome this, a small intra-observer study was completed,  
29 375 and an additional ultrasound scan was performed on 18 willing participants. The examiner was blind  
30 376 to all previous results and shoulder scores. Overall agreement gave a weighted kappa score of 0.915  
31 377 ( $p < 0.001$ ).  
32 378

33 379 The effect of tear size on symptom severity may have been underestimated in this study. The inability  
34 380 to transform the complete data set due to the skew of the OSS data, meant all asymptomatic shoulders  
35 381 had to be removed. Pain severity in the presence of a tear was then compared to a pain severity in a  
36 382 normal (no tendon pathology) shoulder. We recognise that there may be many causes of shoulder pain  
37 383 (e.g., rheumatological causes) and therefore referencing against all causes of painful shoulder may  
38 384 represent the contribution of rotator cuff tear to the symptoms.  
39 385

40 386 The definition of symptoms in previous studies varies widely with no consensus. The decision to use  
41 387 the OSS was based upon its content, construct validity in relation to our research question, and  
42 388 validation of use against other pain scores. Furthermore, dichotomisation of the scale at perfect vs.  
43 389 non-perfect scores is not validated and may make results too sensitive. However, we ran a comparison  
44 390 with 3-point change, as validated as clinically significant by the makers of the OSS, and there was no  
45 391 statistical difference.  
46 392

### 47 393 *Relationship to other studies*

48 394 This study has demonstrated similar prevalence figures to previous studies, but it is the first to use a  
49 395 general population cohort that has been extensively characterised as representative of the western  
50 396 world population.  
51 397

1  
2  
3 398 Further studies have shown that the clinical presentation of rotator cuff tears varies and may or may  
4 399 not be associated with symptoms<sup>17 22 23</sup>. This general population cohort supports this with 48.4% of  
5 400 full-thickness rotator cuff tears being asymptomatic. Prior to this, the only other population-based  
6 401 study looking at symptom association with full-thickness tears was Yamamoto et al.<sup>30</sup> that  
7 402 investigated symptom association with full-thickness tears using a mountain cohort in Japan. They  
8 403 reported 34% of full-thickness tears to be symptomatic. However, unlike the current study, it was not  
9 404 a general population cohort representative of western society. Furthermore, it was subject to selection  
10 405 bias by removing any individuals with restricted shoulder movement or previous treatments.  
11  
12 406

13  
14 407 Further studies have suggested that tear size affects the likelihood of symptoms. The current study  
15 408 supports this with larger tears having a greater than 2-fold increase in relative risk of symptoms than  
16 409 small tears<sup>17 22 23</sup>. A previous study in the Washington series investigated by Yamaguchi et al<sup>26</sup>,  
17 410 reported development of symptoms in previously asymptomatic tendons in the context of a  
18 411 contralateral symptomatic tear. However, this study was subject to selection bias as recruitment  
19 412 occurred in a cohort actively being treated for contralateral symptomatic rotator cuff tears which may  
20 413 have strengthened associations.  
21  
22 414

23  
24 415 This is the first study that has looked at individuals as entities, rather than shoulders, and has  
25 416 highlighted the effect the individual has on symptom presentation, which could include physical and  
26 417 psychological factors unique to that individual – not solely the presence of tendon pathology on  
27 418 imaging. It is also the first study to look at the impact on health services.  
28  
29 419

30 420

### 31 421 **Interpretation**

32 422 This study has shown that although patient reported pain on the Oxford Shoulder Score is associated  
33 423 with rotator cuff tendon pathology, it is not related to the severity of structural pathology identified on  
34 424 ultrasound imaging. The likelihood of pain also appears to be strongly dependent upon the individual  
35 425 rather than simply the pathology. Consequently, clinicians should rely less on imaging findings to  
36 426 explain the cause and severity of shoulder pain presentations. Furthermore, other drivers of shoulder  
37 427 pain should be considered (e.g. pain sensitisation), and treatment be targeted on symptom  
38 428 management rather than solely interventions to improve tendon pathology.  
39  
40 429

41  
42 430 Investigation into the impact of musculoskeletal shoulder pain on the healthcare system revealed that  
43 431 28.8% of people in this general population cohort sought consultation with their GP for shoulder pain,  
44 432 a third of whom had a full thickness tear, and a third with at least one abnormality (no tear). This  
45 433 study highlights the huge burden of shoulder pain on the healthcare system. Though, it does not  
46 434 demonstrate causality of pain as is shown by the lack of symptoms in nearly half of cases and the lack  
47 435 of correlation with the severity of pain and pathology. Nor does it show how the individual affects  
48 436 pain presentation.  
49  
50 437

### 51 438 **Generalisability**

52 439 This epidemiological study that is generalisable to the UK population, demonstrates association but  
53 440 not causality, and leaves unanswered questions as to what additional factors contribute to shoulder  
54 441 pain. Particularly interesting is how individuals may or may not have painful shoulders irrespective of  
55 442 the pathology. Further research into this could provide alternative targets to treatment methods, and  
56 443 potentially reduce the cost of imaging modalities and surgical interventions.  
57  
58 444  
59  
60

## 445 Conclusion

446 In conclusion, this general population study has demonstrated that full-thickness rotator cuff tears are  
 447 common affecting 22.1% of women over the age of 60, and tendon abnormalities affecting 59.4%.  
 448 Despite 41.7% of individuals with a full-thickness tear (48.4% of all full-thickness tears) being  
 449 asymptomatic, tendon abnormalities and tears are associated with pain. The likelihood, but not  
 450 severity of symptoms, increases with greater structural damage.

451  
 452 This high prevalence and association of symptoms results in a significant impact on primary care  
 453 health services, with 28.3% of this population having presented to a GP with shoulder pain. Of these a  
 454 third had a full-thickness tear and a third had an abnormal but non-torn tendon. Overall, 8.9% of this  
 455 cohort had seen their general practitioner with shoulder pain and a full-thickness tear, and 18.8% had  
 456 seen their general practitioner with an abnormal or torn tendon.

## 457 REFERENCES

1. Vos T, Abajobir AA, Abate KH, et al. Global, regional, and national incidence, prevalence, and years lived with disability for 328 diseases and injuries for 195 countries, 1990-2016: a systematic analysis for the Global Burden of Disease Study 2016. *The Lancet* 2017;390(10100):1211-59. doi: 10.1016/S0140-6736(17)32154-2
2. Urwin M, Symmons D, Allison T, et al. Estimating the burden of musculoskeletal disorders in the community: the comparative prevalence of symptoms at different anatomical sites, and the relation to social deprivation. *Annals of the Rheumatic Diseases* 1998;57(11):649-55. doi: 10.1136/ard.57.11.649 [published Online First: 1999/01/30]
3. Pope DP, Croft PR, Pritchard CM, et al. Prevalence of shoulder pain in the community: the influence of case definition. *Annals of the Rheumatic Diseases* 1997;56(5):308-12. doi: 10.1136/ard.56.5.308
4. Bunker T. Rotator cuff disease. *Current Orthopaedics* 2002;16:223-33. doi: 10.1054/cuor.2002.0257
5. Meislin RJ, Sperling JW, Stitik TP. Persistent shoulder pain: epidemiology, pathophysiology, and diagnosis. *The American Journal of Orthopedics* 2005;34(12 Suppl):5-9. [published Online First: 2006/02/03]
6. Roquelaure Y, Ha C, Leclerc A, et al. Epidemiologic surveillance of upper-extremity musculoskeletal disorders in the working population. *Arthritis Rheumatology* 2006;55(5):765-78. doi: 10.1002/art.22222 [published Online First: 2006/10/03]
7. Ng Man Sun S, Gillott E, Bhamra J, et al. Implant use for primary hip and knee arthroplasty: are we getting it right first time? *The Journal of Arthroplasty* 2013;28(6):908-12. doi: 10.1016/j.arth.2012.11.012 [published Online First: 2013/03/20]
8. Hinsley H, Nicholls A, Daines M, et al. Classification of rotator cuff tendinopathy using high definition ultrasound. *Muscles Ligaments Tendons Journal* 2014;4(3):391-7. [published Online First: 2014/12/10]
9. Teefey SA, Rubin DA, Middleton WD, et al. Detection and quantification of rotator cuff tears. Comparison of ultrasonographic, magnetic resonance imaging, and arthroscopic findings in seventy-one consecutive cases. *The Journal of Bone and Joint Surgery American Volume* 2004;86(4):708-16. [published Online First: 2004/04/08]
10. de Jesus JO, Parker L, Frangos AJ, et al. Accuracy of MRI, MR arthrography, and ultrasound in the diagnosis of rotator cuff tears: a meta-analysis. *American Journal of Roentgenology* 2009;192(6):1701-7. doi: 10.2214/ajr.08.1241 [published Online First: 2009/05/22]
11. Naqvi GA, Jadaan M, Harrington P. Accuracy of ultrasonography and magnetic resonance imaging for detection of full thickness rotator cuff tears. *International journal of shoulder surgery* 2009;3(4):94-97. doi: 10.4103/0973-6042.63218
12. Smith TO, Back T, Toms AP, et al. Diagnostic accuracy of ultrasound for rotator cuff tears in adults: a systematic review and meta-analysis. *Clinical Radiology*

- 2011;66(11):1036-48. doi: 10.1016/j.crad.2011.05.007 [published Online First: 2011/07/09]
13. Dinnes J, Loveman E, McIntyre L, et al. The effectiveness of diagnostic tests for the assessment of shoulder pain due to soft tissue disorders: a systematic review. *Health Technology Assessment* 2003;7(29):iii, 1-166. doi: 10.3310/hta7290 [published Online First: 2003/10/22]
  14. Ottenheijm RP, Jansen MJ, Staal JB, et al. Accuracy of diagnostic ultrasound in patients with suspected subacromial disorders: a systematic review and meta-analysis. *Archives of Physical Medicine and Rehabilitation* 2010;91(10):1616-25. doi: 10.1016/j.apmr.2010.07.017 [published Online First: 2010/09/30]
  15. Fehring EV, Sun J, VanOeveren LS, et al. Full-thickness rotator cuff tear prevalence and correlation with function and co-morbidities in patients sixty-five years and older. *Journal of Shoulder and Elbow Surgery* 2008;17(6):881-5. doi: 10.1016/j.jse.2008.05.039 [published Online First: 2008/09/09]
  16. Milgrom C, Schaffler M, Gilbert S, et al. Rotator-cuff changes in asymptomatic adults. The effect of age, hand dominance and gender. *The Journal of Bone & Joint Surgery British Volume* 1995;77(2):296-8. [published Online First: 1995/03/01]
  17. Moosmayer S, Smith HJ, Tariq R, et al. Prevalence and characteristics of asymptomatic tears of the rotator cuff: an ultrasonographic and clinical study. *Journal of Bone and Joint Surgery British Volume* 2009;91(2):196-200. doi: 10.1302/0301-620x.91b2.21069 [published Online First: 2009/02/05]
  18. Tempelhof S, Rupp S, Seil R. Age-related prevalence of rotator cuff tears in asymptomatic shoulders. *Journal of Shoulder and Elbow Surgery* 1999;8(4):296-9. [published Online First: 1999/09/03]
  19. Reilly P, Macleod I, Macfarlane R, et al. Dead men and radiologists don't lie: a review of cadaveric and radiological studies of rotator cuff tear prevalence. *Annals of The Royal College of Surgeons of England* 2006;88(2):116-21. doi: 10.1308/003588406x94968 [published Online First: 2006/03/23]
  20. Yamamoto A, Takagishi K, Osawa T, et al. Prevalence and risk factors of a rotator cuff tear in the general population. *Journal of Shoulder and Elbow Surgery* 2010;19(1):116-20. doi: 10.1016/j.jse.2009.04.006 [published Online First: 2009/06/23]
  21. Schibany N, Zehetgruber H, Kainberger F, et al. Rotator cuff tears in asymptomatic individuals: a clinical and ultrasonographic screening study. *European Journal of Radiology* 2004;51(3):263-8. doi: 10.1016/s0720-048x(03)00159-1 [published Online First: 2004/08/06]
  22. Yamaguchi K, Ditsios K, Middleton WD, et al. The demographic and morphological features of rotator cuff disease. A comparison of asymptomatic and symptomatic shoulders. *Journal of Bone and Joint Surgery American Volume* 2006;88(8):1699-704. doi: 10.2106/jbjs.E.00835 [published Online First: 2006/08/03]
  23. Mall NA, Kim HM, Keener JD, et al. Symptomatic progression of asymptomatic rotator cuff tears: a prospective study of clinical and sonographic variables. *The Journal of Bone and Joint Surgery American Volume* 2010;92(16):2623-33. doi: 10.2106/jbjs.I.00506 [published Online First: 2010/11/19]
  24. Needell SD, Zlatkin MB, Sher JS, et al. MR imaging of the rotator cuff: peritendinous and bone abnormalities in an asymptomatic population. *American Journal of Roentgenology* 1996;166(4):863-7. doi: 10.2214/ajr.166.4.8610564 [published Online First: 1996/04/01]
  25. Sher JS, Uribe JW, Posada A, et al. Abnormal findings on magnetic resonance images of asymptomatic shoulders. *The Journal of Bone and Joint Surgery American Volume* 1995;77(1):10-5. doi: 10.2106/00004623-199501000-00002 [published Online First: 1995/01/01]
  26. Yamaguchi K, Tetro AM, Blam O, et al. Natural history of asymptomatic rotator cuff tears: a longitudinal analysis of asymptomatic tears detected sonographically. *Journal*

- 1  
2  
3 *of Shoulder and Elbow Surgery* 2001;10(3):199-203. doi: 10.1067/mse.2001.113086  
4 [published Online First: 2001/06/16]
- 5 27. Chandnani V, Ho C, Gerharter J, et al. MR findings in asymptomatic shoulders: a blind  
6 analysis using symptomatic shoulders as controls. *Clinical Imaging* 1992;16(1):25-  
7 30. doi: 10.1016/0899-7071(92)90085-n [published Online First: 1992/01/01]
- 8 28. Minagawa H, Yamamoto N, Abe H, et al. Prevalence of symptomatic and asymptomatic  
9 rotator cuff tears in the general population: From mass-screening in one village.  
10 *Journal of orthopaedics* 2013;10(1):8-12. doi: 10.1016/j.jor.2013.01.008 [published  
11 Online First: 2014/01/10]
- 12 29. Harris JD, Pedroza A, Jones GL. Predictors of pain and function in patients with  
13 symptomatic, atraumatic full-thickness rotator cuff tears: a time-zero analysis of a  
14 prospective patient cohort enrolled in a structured physical therapy program.  
15 *American Journal of Sports Medicine* 2012;40(2):359-66. doi:  
16 10.1177/0363546511426003 [published Online First: 2011/11/19]
- 17 30. Yamamoto A, Takagishi K, Kobayashi T, et al. Factors involved in the presence of  
18 symptoms associated with rotator cuff tears: a comparison of asymptomatic and  
19 symptomatic rotator cuff tears in the general population. *Journal of Shoulder and*  
20 *Elbow Surgery* 2011;20(7):1133-7. doi: 10.1016/j.jse.2011.01.011 [published Online  
21 First: 2011/04/02]
- 22 31. Arden NK, Griffiths GO, Hart DJ, et al. The association between osteoarthritis and  
23 osteoporotic fracture: the Chingford Study. *The British Journal of Rheumatology*  
24 1996;35(12):1299-304. doi: 10.1093/rheumatology/35.12.1299 [published Online  
25 First: 1996/12/01]
- 26 32. Hart DJ, Mootoosamy I, Doyle DV, et al. The relationship between osteoarthritis and  
27 osteoporosis in the general population: the Chingford Study. *Annals of the Rheumatic*  
28 *Diseases* 1994;53(3):158-62. doi: 10.1136/ard.53.3.158 [published Online First:  
29 1994/03/01]
- 30 33. Hart DJ, Spector TD. The relationship of obesity, fat distribution and osteoarthritis in  
31 women in the general population: the Chingford Study. *Journal of Rheumatology*  
32 1993;20(2):331-5. [published Online First: 1993/02/01]
- 33 34. Dawson J, Fitzpatrick R, Carr A. Questionnaire on the perceptions of patients about  
34 shoulder surgery. *The Journal of Bone and Joint Surgery British Volume*  
35 1996;78(4):593-600. [published Online First: 1996/07/01]
- 36 35. Dawson J, Rogers K, Fitzpatrick R, et al. The Oxford shoulder score revisited. *Archives of*  
37 *Orthopaedic and Trauma Surgery* 2009;129(1):119-23. doi: 10.1007/s00402-007-  
38 0549-7 [published Online First: 2008/01/10]
- 39 36. Murphy RJ, Daines MT, Carr AJ, et al. An independent learning method for orthopaedic  
40 surgeons performing shoulder ultrasound to identify full-thickness tears of the rotator  
41 cuff. *The Journal of Bone and Joint Surgery American Volume* 2013;95(3):266-72.  
42 doi: 10.2106/jbjs.K.00706 [published Online First: 2013/02/08]
- 43  
44  
45  
46  
47  
48  
49  
50  
51  
52  
53  
54  
55  
56  
57  
58  
59  
60

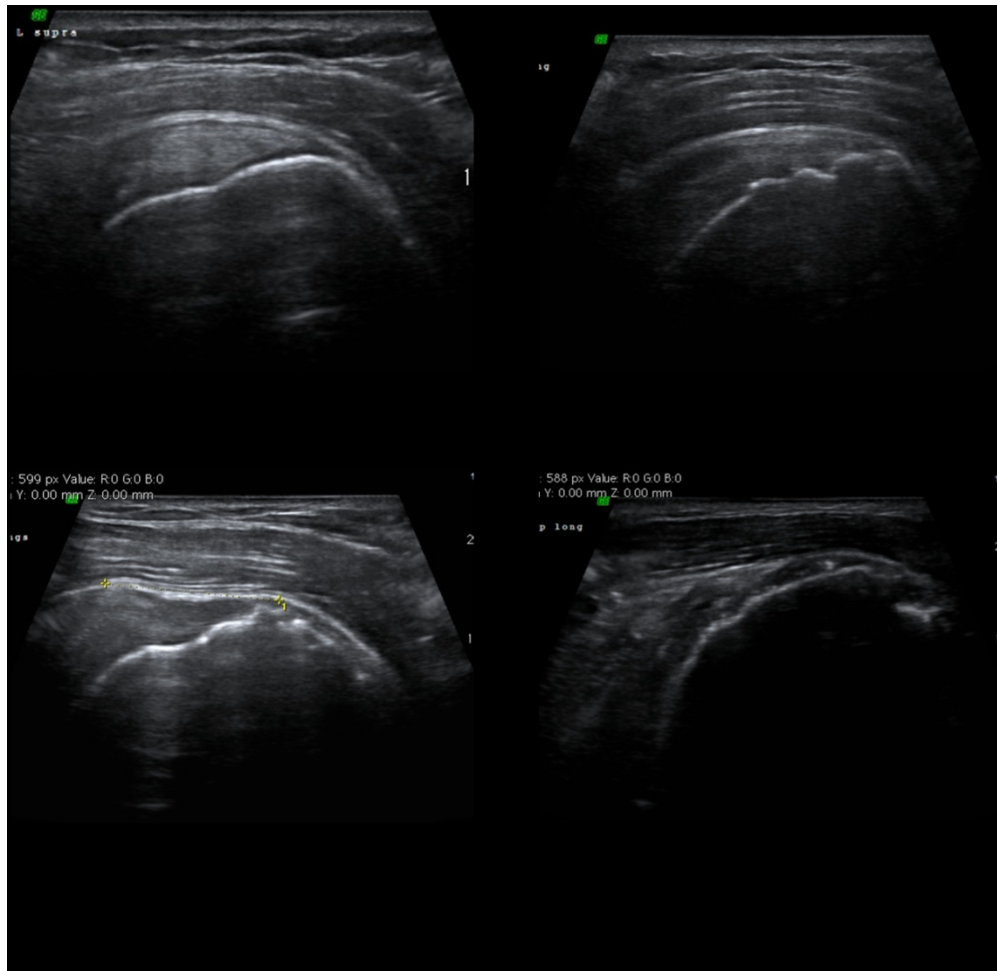

Tendon classification on ultrasound: (i) normal tendon: normal homogenous appearance throughout with no abnormality at the enthesis; (ii) abnormal tendon: loss of homogenous appearance and abnormal ragged enthesis +/- enlarged fluid-filled bursa or partial thickness tear; (iii) full thickness tear (0-2.5cm): lucent patch through the full thickness of the tendon with tear size defined as its width in the sagittal plane (iv) full-thickness tears (>2.5cm): Evidence of large defect or no evidence of tendon tissue present.

106x102mm (300 x 300 DPI)

1  
2  
3  
4  
5  
6  
7  
8  
9  
10  
11  
12  
13  
14  
15  
16  
17  
18  
19  
20  
21  
22  
23  
24  
25  
26  
27  
28  
29  
30  
31  
32  
33  
34  
35  
36  
37  
38  
39  
40  
41  
42  
43  
44  
45  
46  
47  
48  
49  
50  
51  
52  
53  
54  
55  
56  
57  
58  
59  
60



Figure 2. Distribution of symptoms across each tendon group

116x68mm (144 x 144 DPI)



## STROBE Statement—checklist of items that should be included in reports of observational studies

|                              | Item No. | Recommendation                                                                                                                                                                                                                                                                                                                                                                                                                                                                                                                                                                                                                                                                                   | Page No.  | Relevant text from manuscript |
|------------------------------|----------|--------------------------------------------------------------------------------------------------------------------------------------------------------------------------------------------------------------------------------------------------------------------------------------------------------------------------------------------------------------------------------------------------------------------------------------------------------------------------------------------------------------------------------------------------------------------------------------------------------------------------------------------------------------------------------------------------|-----------|-------------------------------|
| <b>Title and abstract</b>    | 1        | (a) Indicate the study's design with a commonly used term in the title or the abstract                                                                                                                                                                                                                                                                                                                                                                                                                                                                                                                                                                                                           | Page 1 -  | title of the manuscript       |
|                              |          | (b) Provide in the abstract an informative and balanced summary of what was done and what was found                                                                                                                                                                                                                                                                                                                                                                                                                                                                                                                                                                                              | Page 3    |                               |
| <b>Introduction</b>          |          |                                                                                                                                                                                                                                                                                                                                                                                                                                                                                                                                                                                                                                                                                                  |           |                               |
| Background/rationale         | 2        | Explain the scientific background and rationale for the investigation being reported                                                                                                                                                                                                                                                                                                                                                                                                                                                                                                                                                                                                             | Page 4 -  | line 128-153                  |
| Objectives                   | 3        | State specific objectives, including any prespecified hypotheses                                                                                                                                                                                                                                                                                                                                                                                                                                                                                                                                                                                                                                 | page 4    | lines 150-154                 |
| <b>Methods</b>               |          |                                                                                                                                                                                                                                                                                                                                                                                                                                                                                                                                                                                                                                                                                                  |           |                               |
| Study design                 | 4        | Present key elements of study design early in the paper                                                                                                                                                                                                                                                                                                                                                                                                                                                                                                                                                                                                                                          | Page 4 -  | lines 165-176                 |
| Setting                      | 5        | Describe the setting, locations, and relevant dates, including periods of recruitment, exposure, follow-up, and data collection                                                                                                                                                                                                                                                                                                                                                                                                                                                                                                                                                                  | Page 4 -  | lines 165-176                 |
| Participants                 | 6        | (a) <i>Cohort study</i> —Give the eligibility criteria, and the sources and methods of selection of participants. Describe methods of follow-up<br><i>Case-control study</i> —Give the eligibility criteria, and the sources and methods of case ascertainment and control selection. Give the rationale for the choice of cases and controls<br><i>Cross-sectional study</i> —Give the eligibility criteria, and the sources and methods of selection of participants<br>(b) <i>Cohort study</i> —For matched studies, give matching criteria and number of exposed and unexposed<br><i>Case-control study</i> —For matched studies, give matching criteria and the number of controls per case | Pages -   | lines 165-176                 |
| Variables                    | 7        | Clearly define all outcomes, exposures, predictors, potential confounders, and effect modifiers. Give diagnostic criteria, if applicable                                                                                                                                                                                                                                                                                                                                                                                                                                                                                                                                                         | Page 5 -  | lines 182-198                 |
| Data sources/<br>measurement | 8*       | For each variable of interest, give sources of data and details of methods of assessment (measurement). Describe comparability of assessment methods if there is more than one group                                                                                                                                                                                                                                                                                                                                                                                                                                                                                                             | Page 5 -  | lines 181-198                 |
| Bias                         | 9        | Describe any efforts to address potential sources of bias                                                                                                                                                                                                                                                                                                                                                                                                                                                                                                                                                                                                                                        | Page 10 - | lines 351-393                 |
| Study size                   | 10       | Explain how the study size was arrived at                                                                                                                                                                                                                                                                                                                                                                                                                                                                                                                                                                                                                                                        | Page 4 -  | Lines 174-177                 |

Continued on next page

|                        |     |                                                                                                                                                                                                                                                                                                                                                                                                                                                                                                                                                                   |                                           |
|------------------------|-----|-------------------------------------------------------------------------------------------------------------------------------------------------------------------------------------------------------------------------------------------------------------------------------------------------------------------------------------------------------------------------------------------------------------------------------------------------------------------------------------------------------------------------------------------------------------------|-------------------------------------------|
| Quantitative variables | 11  | Explain how quantitative variables were handled in the analyses. If applicable, describe which groupings were chosen and why                                                                                                                                                                                                                                                                                                                                                                                                                                      | Page 5-6 - lines 207-236                  |
| Statistical methods    | 12  | (a) Describe all statistical methods, including those used to control for confounding<br>(b) Describe any methods used to examine subgroups and interactions<br>(c) Explain how missing data were addressed<br>(d) <i>Cohort study</i> —If applicable, explain how loss to follow-up was addressed<br><i>Case-control study</i> —If applicable, explain how matching of cases and controls was addressed<br><i>Cross-sectional study</i> —If applicable, describe analytical methods taking account of sampling strategy<br>(e) Describe any sensitivity analyses | SECTION 12 - Page 5-6 - lines 207-236     |
| <b>Results</b>         |     |                                                                                                                                                                                                                                                                                                                                                                                                                                                                                                                                                                   |                                           |
| Participants           | 13* | (a) Report numbers of individuals at each stage of study—eg numbers potentially eligible, examined for eligibility, confirmed eligible, included in the study, completing follow-up, and analysed<br>(b) Give reasons for non-participation at each stage<br>(c) Consider use of a flow diagram                                                                                                                                                                                                                                                                   | Page 6 - lines 239-246                    |
| Descriptive data       | 14* | (a) Give characteristics of study participants (eg demographic, clinical, social) and information on exposures and potential confounders<br>(b) Indicate number of participants with missing data for each variable of interest<br>(c) <i>Cohort study</i> —Summarise follow-up time (eg, average and total amount)                                                                                                                                                                                                                                               | Page 6 - lines 239-246                    |
| Outcome data           | 15* | <i>Cohort study</i> —Report numbers of outcome events or summary measures over time<br><i>Case-control study</i> —Report numbers in each exposure category, or summary measures of exposure<br><i>Cross-sectional study</i> —Report numbers of outcome events or summary measures                                                                                                                                                                                                                                                                                 | Pages 6-9                                 |
| Main results           | 16  | (a) Give unadjusted estimates and, if applicable, confounder-adjusted estimates and their precision (eg, 95% confidence interval). Make clear which confounders were adjusted for and why they were included<br>(b) Report category boundaries when continuous variables were categorized<br>(c) If relevant, consider translating estimates of relative risk into absolute risk for a meaningful time period                                                                                                                                                     | Results tables, pages 6-9 - lines 248-325 |

Continued on next page

|                          |    |                                                                                                                                                                            |                         |
|--------------------------|----|----------------------------------------------------------------------------------------------------------------------------------------------------------------------------|-------------------------|
| Other analyses           | 17 | Report other analyses done—eg analyses of subgroups and interactions, and sensitivity analyses                                                                             | Not applicable          |
| <b>Discussion</b>        |    |                                                                                                                                                                            |                         |
| Key results              | 18 | Summarise key results with reference to study objectives                                                                                                                   | Page 9- lines 328-351   |
| Limitations              | 19 | Discuss limitations of the study, taking into account sources of potential bias or imprecision. Discuss both direction and magnitude of any potential bias                 | Page 10 - 356-392       |
| Interpretation           | 20 | Give a cautious overall interpretation of results considering objectives, limitations, multiplicity of analyses, results from similar studies, and other relevant evidence | Page 11 - lines 422-437 |
| Generalisability         | 21 | Discuss the generalisability (external validity) of the study results                                                                                                      | Page 11 - lines 440-445 |
| <b>Other information</b> |    |                                                                                                                                                                            |                         |
| Funding                  | 22 | Give the source of funding and the role of the funders for the present study and, if applicable, for the original study on which the present article is based              | Page 2 - lines 50-53    |

\*Give information separately for cases and controls in case-control studies and, if applicable, for exposed and unexposed groups in cohort and cross-sectional studies.

**Note:** An Explanation and Elaboration article discusses each checklist item and gives methodological background and published examples of transparent reporting. The STROBE checklist is best used in conjunction with this article (freely available on the Web sites of PLoS Medicine at <http://www.plosmedicine.org/>, Annals of Internal Medicine at <http://www.annals.org/>, and Epidemiology at <http://www.epidem.com/>). Information on the STROBE Initiative is available at [www.strobe-statement.org](http://www.strobe-statement.org).

# BMJ Open

**Prevalence of rotator cuff tendon tears and symptoms in a Chingford general population cohort, and the resultant impact on United Kingdom health services: A cross-sectional observational study.**

|                                 |                                                                                                                                                                                                                                                                                                                                                                                                                                                                                                                            |
|---------------------------------|----------------------------------------------------------------------------------------------------------------------------------------------------------------------------------------------------------------------------------------------------------------------------------------------------------------------------------------------------------------------------------------------------------------------------------------------------------------------------------------------------------------------------|
| Journal:                        | <i>BMJ Open</i>                                                                                                                                                                                                                                                                                                                                                                                                                                                                                                            |
| Manuscript ID                   | bmjopen-2021-059175.R2                                                                                                                                                                                                                                                                                                                                                                                                                                                                                                     |
| Article Type:                   | Original research                                                                                                                                                                                                                                                                                                                                                                                                                                                                                                          |
| Date Submitted by the Author:   | 18-May-2022                                                                                                                                                                                                                                                                                                                                                                                                                                                                                                                |
| Complete List of Authors:       | Hinsley, Hannah; University of Oxford Nuffield Department of Orthopaedics Rheumatology and Musculoskeletal Sciences Ganderton, Charlotte; Swinburne University of Technology Faculty of Health Arts and Design, Nursing and Allied Health Arden, Nigel; University of Oxford , University of Oxford Nuffield Department of Orthopaedics Rheumatology and Musculoskeletal Sciences, Carr, Andrew; University of Oxford, University of Oxford Nuffield Department of Orthopaedics Rheumatology and Musculoskeletal Sciences, |
| <b>Primary Subject Heading</b>: | Public health                                                                                                                                                                                                                                                                                                                                                                                                                                                                                                              |
| Secondary Subject Heading:      | Diagnostics, Evidence based practice, Sports and exercise medicine                                                                                                                                                                                                                                                                                                                                                                                                                                                         |
| Keywords:                       | Shoulder < ORTHOPAEDIC & TRAUMA SURGERY, Ultrasonography < OBSTETRICS, Musculoskeletal disorders < ORTHOPAEDIC & TRAUMA SURGERY, Diagnostic radiology < RADIOLOGY & IMAGING                                                                                                                                                                                                                                                                                                                                                |
|                                 |                                                                                                                                                                                                                                                                                                                                                                                                                                                                                                                            |

SCHOLARONE™  
Manuscripts



I, the Submitting Author has the right to grant and does grant on behalf of all authors of the Work (as defined in the below author licence), an exclusive licence and/or a non-exclusive licence for contributions from authors who are: i) UK Crown employees; ii) where BMJ has agreed a CC-BY licence shall apply, and/or iii) in accordance with the terms applicable for US Federal Government officers or employees acting as part of their official duties; on a worldwide, perpetual, irrevocable, royalty-free basis to BMJ Publishing Group Ltd ("BMJ") its licensees and where the relevant Journal is co-owned by BMJ to the co-owners of the Journal, to publish the Work in this journal and any other BMJ products and to exploit all rights, as set out in our [licence](#).

The Submitting Author accepts and understands that any supply made under these terms is made by BMJ to the Submitting Author unless you are acting as an employee on behalf of your employer or a postgraduate student of an affiliated institution which is paying any applicable article publishing charge ("APC") for Open Access articles. Where the Submitting Author wishes to make the Work available on an Open Access basis (and intends to pay the relevant APC), the terms of reuse of such Open Access shall be governed by a Creative Commons licence – details of these licences and which [Creative Commons](#) licence will apply to this Work are set out in our licence referred to above.

Other than as permitted in any relevant BMJ Author's Self Archiving Policies, I confirm this Work has not been accepted for publication elsewhere, is not being considered for publication elsewhere and does not duplicate material already published. I confirm all authors consent to publication of this Work and authorise the granting of this licence.

1  
2  
3 1 **Prevalence of rotator cuff tendon tears and symptoms in a Chingford general population**  
4 2 **cohort, and the resultant impact on United Kingdom health services: A cross-sectional**  
5 3 **observational study.**  
6 4

7 5 Hannah Hinsley<sup>1\*</sup>, Charlotte Ganderton<sup>2</sup>, Nigel Arden<sup>1^</sup>, Andrew Carr<sup>1^</sup>

8 6 <sup>1</sup> The Nuffield Department of Orthopaedics, Rheumatology and Musculoskeletal Sciences, University  
9 7 of Oxford, Oxford, United Kingdom

10 8 <sup>2</sup> Department of Health Sciences and Biostatistics, Faculty of Health Arts and Design, Swinburne  
11 9 University of Technology, Hawthorn, Victoria, Australia

12  
13  
14  
15  
16 10  
17 11 **Author information:**

18 12 Dr Hannah Hinsley; Orthopaedic Surgeon, ARUK orthopaedic clinical research fellow, The Nuffield  
19 13 Department of Orthopaedics, Rheumatology and Musculoskeletal Sciences, University of Oxford,  
20 14 United Kingdom; [hannahoag@doctors.org.uk](mailto:hannahoag@doctors.org.uk)

21 15  
22 16 <sup>^</sup>Professor Nigel Arden; Lead of Musculoskeletal Epidemiology, Deputy Director Centre for Sport,  
23 17 Exercise & Osteoarthritis Research Versus Arthritis and Fellow at the Lady Margaret Hall at The  
24 18 Nuffield Department of Orthopaedics, Rheumatology and Musculoskeletal Sciences, University of  
25 19 Oxford, United Kingdom; [nigel.arden@ndorms.ox.ac.uk](mailto:nigel.arden@ndorms.ox.ac.uk)

26 20  
27 21 Dr Charlotte Ganderton, Physiotherapist and Lecturer at the Department of Health Sciences and  
28 22 Biostatistics, Faculty of Health Arts and Design, Swinburne University of Technology, Hawthorn,  
29 23 Victoria, Australia, [cganderton@swin.edu.au](mailto:cganderton@swin.edu.au)

30 24  
31 25 <sup>^</sup>Professor Andrew Carr, Professor of Orthopaedics at The Nuffield Department of Orthopaedics,  
32 26 Rheumatology and Musculoskeletal Sciences, University of Oxford, United Kingdom; Director of the  
33 27 Botnar Research Centre; [andrew.carr@ndorms.ox.ac.uk](mailto:andrew.carr@ndorms.ox.ac.uk)

34 28  
35 29 \*Corresponding author: Dr Hannah Hinsley

36 30 Contact address: Nuffield Department of Orthopaedics, Rheumatology and Musculoskeletal Sciences,  
37 31 NIHR Biomedical Research Unit, Botnar Research Centre, University of Oxford, Nuffield  
38 32 Orthopaedic Centre, Windmill Road, OX3-7LD Oxford, United Kingdom  
39 33 Email: [hannahoag@doctors.org.uk](mailto:hannahoag@doctors.org.uk)

40 34  
41 35 <sup>^</sup>Senior co-authors  
42 36  
43 37  
44 38  
45  
46  
47  
48  
49  
50  
51  
52  
53  
54  
55  
56  
57  
58  
59  
60

1  
2  
3 39 **Contributors:** HH, NA, AC were responsible for planning, conducting, and reporting the work  
4 40 described in the article. HH and CG drafted the manuscript. All authors approved the final version of  
5 41 the article. HH, NA and AC had access to all the data in the study and can take responsibility for the  
6 42 integrity of the data and the accuracy of the data analysis. HH is guarantor. The corresponding author  
7 43 attests that all listed authors meet authorship criteria and that no others meeting the criteria have been  
8 44 omitted. All authors fully acknowledge the contribution of the patients that participated in this study.  
9 45 No authors are employees of the National Institutes of Health.

10  
11  
12  
13 46 **Transparency Statement:** The lead author (the manuscript's guarantor) affirms that the manuscript  
14 47 is an honest, accurate, and transparent account of the study being reported; that no important aspects  
15 48 of the study have been omitted; and that any discrepancies from the study as planned (and, if relevant,  
16 49 registered) have been explained.

17 50  
18 51 **Role of the funding source:** Arthritis Research United Kingdom awarded the project £190,361.00 to  
19 52 cover costs to completion. Researchers were independent from the funding body. All authors, external  
20 53 and internal, had full access to all the data (including statistical reports and tables) in the study and  
21 54 can take responsibility for the integrity of the data and the accuracy of the data analysis.

22 55  
23 56 **Competing interests:** No competing interests

24 57  
25 58 **Ethics approval:** Outer North East London Research Ethics Committee (formerly Barking and  
26 59 Havering and Waltham Forest RECs), LREC (R&WF) reference ID = 96.

#### 30 60 **Acknowledgement**

31 61 Thank you to Dr Gemma Wallis, Statistician, for reviewing statistical analysis processes used in this  
32 62 study.  
33 63

34 64  
35 65 **Data sharing:** For information about the Chingford 1000 Women Study,  
36 66 email [chingford@ndorms.ox.ac.uk](mailto:chingford@ndorms.ox.ac.uk).

37 67  
38 68 **Dissemination to participants and related patient and public communities:** We will disseminate  
39 69 our findings to patient organisations and media outlets.

40 70  
41 71 **Provenance and peer review:** Not commissioned; peer reviewed at Orthopaedic meetings.  
42 72  
43  
44  
45  
46  
47  
48  
49  
50  
51  
52  
53  
54  
55  
56  
57  
58  
59  
60

## Structured Abstract

### Objectives:

To define the population prevalence of rotator cuff tears and test their association with pain and function loss; determine if severity symptom correlates with tear stage severity, and quantify the impact of symptomatic rotator cuff tears on primary health care services, in a general population cohort of women.

### Design:

Cross sectional observational study.

### Participants:

Individuals were part of the Chingford 1000 women cohort, a 20-year-old longitudinal population study comprising 1003 women aged between 64 and 87, and representative of the population of the UK.

### Main outcome measures:

Rotator cuff pathology prevalence on ultrasound, shoulder symptoms using the Oxford shoulder score, and resultant number of GP consultations.

### Results:

The population prevalence of full-thickness tears was 22.2%, which increased with age ( $p=0.004$ ), and whether it was the dominant arm (RR 1.64, OR 1.58, 95% CI 1.07-2.33,  $p=0.021$ ).

Although 48.4% of full-thickness tears were asymptomatic there was an association between rotator cuff tears and patient reported symptoms. Individuals with at least one full-thickness tear were 1.97 times more likely, than those with bilateral normal tendons (OR 3.53, 95%CI 2.00-5.61,  $p<0.001$ ), to have symptoms. Severity of symptoms was not related to the severity of the pathology until tears are  $>2.5\text{cm}$  ( $p=0.009$ ).

In the cohort 8.9% had seen their GP with shoulder pain and a full-thickness rotator cuff tear, 18.8% with shoulder pain and an abnormality and 29.3% with shoulder pain.

### Conclusion:

Rotator cuff tears are common, and primary care services are heavily impacted. As 50% of tears remain asymptomatic, future research may investigate the cause of pain and whether different treatment modalities, aside from addressing the pathology, need further investigation.

### Trial Registration:

The local ethics committee approved the study (Outer North East London Research Ethics Committee (formerly Barking and Havering and Waltham Forest RECs), LREC (R&WF) reference ID = 96).

### Strengths and limitations of this study:

- Pain on the Oxford Shoulder Score is associated with the presence of rotator cuff tendon pain, but not the extent of structural pathology identified on ultrasound imaging.
- Rotator cuff pathology and associated symptoms pose a large burden on the healthcare system with 28.8% of people seeking GP consultation for their shoulder pain.
- This epidemiological study demonstrates association but not causality and leaves unanswered questions as to what additional factors contribute to shoulder pain.



## 122 Introduction

### 123 Background

124 Musculoskeletal pain is one of the most common sources of disability in the Western world<sup>1</sup>. The  
125 shoulder is the third most common site of musculoskeletal disease<sup>2</sup>, with an estimated 20% of the  
126 population reporting pain at any given time<sup>3</sup>. Pain related to rotator cuff tears are estimated to account  
127 for 30-40% of these shoulder complaints<sup>4</sup>, causing high levels of disability and associated healthcare  
128 costs<sup>5-7</sup>. High-definition ultrasound is the current gold standard for the detection of full-thickness  
129 tears, and is a valid tool to detect an abnormal tendon enthesis<sup>8</sup>, but has poorer accuracy to detect  
130 partial-thickness tears<sup>8-14</sup>. Full thickness tears are recognised to be common and associated with  
131 increasing age<sup>15-18</sup>, however prevalence in symptomatic and asymptomatic shoulders varies widely  
132 across cadaveric<sup>19</sup>, radiological<sup>19</sup> and retrospective cohort studies<sup>16-18 20-28</sup>. Furthermore, the presence  
133 of selection bias in studies undertaken in rotator cuff tendon tears<sup>16-28</sup>, has meant population-based  
134 studies available, are not representative of Western demographics. Thus, research in this area may  
135 lead to a better understanding of the natural history of rotator cuff tears.

136  
137 Clinical manifestations of rotator cuff tears are varied<sup>15 17 22 26 28</sup>, and detection of pathology and its  
138 relationship to clinical symptoms is not well established. Many tears are asymptomatic but are  
139 thought to be a risk of developing symptoms with time<sup>26</sup>. Although larger tears are more likely to be  
140 painful, there is also no evidence to suggest that they have a greater severity of symptoms than  
141 smaller tears<sup>29</sup>. One population cohort from a mountainous region has suggested that only a third of  
142 full-thickness tears were painful, of which symptoms were more prevalent in the dominant arm<sup>30</sup>.  
143 However, all studies investigating symptom association have looked at isolated shoulders, and have  
144 not considered that the individual, has two shoulders. It is therefore plausible that there may be the  
145 presence of other physical or psychological factors unique to the individual, rather than the specific  
146 shoulder, that may have an influence on symptom presentation, rather than solely the underlying  
147 pathology. To date, no study has explored the association between rotator cuff tears, pain and  
148 functional loss in a general population cohort, or how these impact on a health service.

### 150 Objectives

151 This study aims to: (i) describe the population prevalence of different stages of rotator cuff tear in a  
152 general population cohort of women; (ii) determine what proportion of rotator cuff tears are  
153 symptomatic, and whether the severity of symptoms correlates with tear stage severity; (iii) identify  
154 individual influences on the likelihood of symptoms and (iv) quantify the impact of symptomatic  
155 rotator cuff tears on primary health care services.

### 157 Methods

#### 158 *Study Design, Setting and Participants (including study size)*

159 Participants in this cross-sectional observational study were involved in the larger Chingford 1000  
160 women study. This is an ethically approved well described prospective population-based longitudinal  
161 study of osteoarthritis and osteoporosis comprising 1003 white Caucasian women, derived from the  
162 register of a large general practice in Chingford, North London<sup>31-33</sup>. The cohort was recruited in 1989  
163 where the women were aged 44-67. They have been characterised as representative of women in the  
164 UK general population with respect to weight, height, and smoking characteristics. The cohort has  
165 been subsequently listed by the National Institute for Health Research as an important  
166 epidemiological resource. This study took place at the Chingford 20 year follow up visit where 516 of  
167 the original 1003 cohort attended (158 women had died, 111 were unable to attend, 218 had moved  
168 away or been lost to follow up). A musculoskeletal assessment, including the Oxford shoulder score,

1  
2  
3 169 and shoulder ultrasound examination was performed on both shoulders (left and right) in 463 women  
4 170 (Out of the 515, 52 attended but did not have a shoulder assessment due to lack of assessor, and 1 did  
5 171 not complete an Oxford shoulder score). The local ethics committee approved the study and consent  
6 172 was obtained from each woman (Outer North East London Research Ethics Committee (formerly  
7 173 Barking and Havering and Waltham Forest RECs), LREC (R&WF) reference ID = 96).

8 174

9 175 *Variables and data sources:*

10 176 Participant characteristics of age, height, weight, hand dominance, and a self-reported  
11 177 musculoskeletal questionnaire filled out a priori (including the Oxford Shoulder Score<sup>34 35</sup>, body chart  
12 178 and questions regarding previous pain, treatments and whether medical advice has been sought), were  
13 179 all collected at baseline. A musculoskeletal ultrasound assessment on bilateral shoulders was then  
14 180 undertaken using a fixed SOPP (standard operating procedure protocol).

15 181

16 182 The ultrasound examination of the 464 women was completed by two orthopaedic assessors and  
17 183 performed using a GE voluson i-portable ultrasound machine with a 10-16MHz linear probe.  
18 184 Ultrasound training and appropriate validation studies<sup>36</sup> were completed as recommended by the  
19 185 BESS focus group - 343 individuals were scanned by assessor 1 and 121 individuals by assessor two.  
20 186 Appropriate inter and intra-rater reliability studies were performed and showed high reproducibility  
21 187 (weighted kappa 0.92  $p < 0.001$ ) and no difference in reporting trends ( $p = 0.08$ ). The ultrasound  
22 188 protocol was derived according to the recommendations of the Nuffield Orthopaedic Centre  
23 189 Musculoskeletal radiology department. Tendons were classified into one of four working groups  
24 190 based upon ultrasound measurements as validated by Hinsley et al.<sup>8</sup>: normal tendon; abnormal tendon  
25 191 and partial thickness tear; single tendon full-thickness tears (0-2.5cm) and multi-tendon full-thickness  
26 192 tears ( $> 2.5$ cm) (Figure 1).

27 193

28 194 [INSERT FIGURE 1]

29 195

30 196 *Quantitative variables and Statistical methods*

31 197 All statistics were performed using IBM SPSS Statistics version 22 (IBM, Armonk, NY, USA).  
32 198 Age, BMI, hand dominance, and symptom presence were compared across the four different tendon  
33 199 pathology groups. Wilcoxon rank sum test, one-way ANOVA, and chi-squared tests were used for  
34 200 non-normal, normal and categorical data respectively.

35 201

36 202 Population prevalence of full-thickness tears was defined as having at least one unilateral full-  
37 203 thickness tear. Population prevalence of tendon abnormalities was defined as having at least a  
38 204 unilateral tendon abnormality ranging from abnormal enthesis to a full thickness tear. This was  
39 205 calculated by summing the percentage with unilateral tears and the percentage with bilateral tears for  
40 206 each age group.

41 207

42 208 Symptoms were defined using the Oxford shoulder score<sup>34 35</sup>. This was chosen for what the authors  
43 209 believed represented the best content and construct validity as applicable to the study as it covers a  
44 210 range of symptoms (both relating to pain and function) over a 4-week time period, and also allows  
45 211 discriminate ability. Binary symptoms were defined by dichotomising the Oxford shoulder score<sup>34 35</sup>  
46 212 where, any non-perfect score ( $\leq 47/48$ ) was classified as symptomatic. The cut off at 47 was used to  
47 213 determine symptoms as we were not looking for significant changes, rather, the ability to detect any  
48 214 individual who was unable to perform an activity to the full, or who has pain at any given time. We  
49 215 validated this by running a Pearson correlation sub analysis between the OSS pain subset with the  
50 NRS ( $R = 0.816$ ,  $p < 0.001$ , 95% CI 0.793-0.836) and a simple binary question ( $R = 0.812$ ,  $p < 0.001$ , 95%

216 CI 0.789-0.833), and the full OSS with a binary pain question ( $R=0.759$ ,  $p<0.001$ , 95% CI 0.730-  
 217 0.785). Furthermore, we re-ran the analysis using a 3-point difference to reflect a clinically significant  
 218 difference between groups and the results were not significantly different. Where questions are pain  
 219 specific, the four pain specific questions of the OSS were used as a sub-scale. In symptomatic  
 220 participants, the full OSS scale, scored on a 0-48 point scale, was used to define symptom severity. A  
 221  $\chi^2$  test was used to determine any difference between tendon pathology groups. Multivariate binary  
 222 logistic regression was used to adjust for the potential confounders age, BMI and hand dominance  
 223 determined a priori. To account for a high positive skew of the OSS data when determining symptom  
 224 severity, all asymptomatic shoulders were removed, and a logarithmic transformation of the inverse  
 225 OSS was used to create a normal distribution. Symptom severity in symptomatic shoulders was  
 226 compared across tendon pathology groups using a 1-way ANOVA. Multivariate linear regression was  
 227 used to adjust for potential confounders age, and hand dominance determined a priori.

### 229 Patient and public involvement

230 We would like to thank all the participants of the Chingford Women Study for their time.  
 231 We would also like to thank Mrs Maxine Daniels and Dr Alan Hakim for their time and dedication,  
 232 and both Mr Alex Nichols and Mr Michael Daines for their assistance with data collection and Dr  
 233 Gemma Wallis for her assistance with data analysis.

## 234 Results

### 235 Participants and descriptive data

236 464 individuals (928 shoulders) were included in the study (Table 1). The distribution of age across  
 237 each tendon pathology group was significantly different ( $p<0.001$ ), with age increasing in accordance  
 238 with tear severity. There was a statistical difference in the proportion of dominant and non-dominant  
 239 arms in each tendon pathology group ( $p=0.033$ ), with there being significantly more non-dominant  
 240 arms in the normal tendon group ( $p=0.010$ ), and significantly more dominant arms in those with full-  
 241 thickness tears ( $p=0.026$ ). There were no between-group differences in BMI ( $p=0.080$ ).

243 Table 1. Demographics of all the shoulders included in the study

|                                | Frequency | %     | Median age | Mean BMI | Dominant arm (%) |
|--------------------------------|-----------|-------|------------|----------|------------------|
| Normal                         | 510       | 55.0% | 70         | 27.5     | 46.1%            |
| Abnormal/ Partial tear         | 294       | 31.7% | 73         | 28.0     | 52.7%            |
| Full-thickness tears (0-2.5cm) | 85        | 9.2%  | 74         | 27.9     | 58.8%            |
| Full-thickness tears (>2.5cm)  | 39        | 4.2%  | 74         | 29.6     | 61.5%            |
| All                            | 928       | 100%  | 71         | 27.8     | 50%              |

### 244 Outcome data and main results

#### 245 *Prevalence of rotator cuff tendon pathology*

246 The population prevalence of having at least one full-thickness tear was 22.2% (4.5% bilateral). For  
 247 age groups 60-69, 70-79 and 80-89 these were 14.9%; 25.9% and 29% respectively, and bilateral tears  
 248 2.3%; 5.9% and 5.8% respectively. The difference in prevalence between age groups was statistically  
 249 different ( $p<0.001$ ).

250  
 251 The population prevalence of having at least a unilateral tendon pathology or tear was 59.5% (30.6%  
 252 bilateral). For age groups 60-69, 70-79 and 80-89 these were 51.5%; 61.8% and 72.5% respectively,

and bilateral tears 24.6%; 32.3% and 40.6% respectively. The difference in population prevalence between age groups was statistically significant ( $p<0.001$ ).

Table 2 shows the prevalence of rotator cuff tendinopathy in the dominant and non-dominant arms in age deciles. The distribution of tendinopathy differed between age groups (Dominant arm  $p=0.002$ ; non-dominant arm  $p=0.037$ ) with more pathology found in older age groups, and in the dominant compared to non-dominant arms ( $p=0.004$ ). There was no difference in prevalence according to BMI group. The relative risk of full-thickness tear was 1.64 (OR 1.580, 95%CI 1.073-2.326,  $p=0.021$ ) in the dominant compared to non-dominant arm. For those aged 70-79 it was 2.072 (OR 2.026, 95%CI 1.286-3.190,  $p=0.002$ ), and aged 80-89 was 2.293 (OR 2.256, 95%CI 1.264-4.027,  $p=0.006$ ), compared to those aged 60-69.

Table 2. Prevalence of rotator cuff tendon pathology according to age decile and arm dominance

|                                        | Age Group     |       |               |       |              |       |               |       |
|----------------------------------------|---------------|-------|---------------|-------|--------------|-------|---------------|-------|
|                                        | 60-69 (n=175) |       | 70-79 (n=220) |       | 80-89 (n=69) |       | Total (n=464) |       |
|                                        | Count         | %     | Count         | %     | Count        | %     | Count         | %     |
| <b>Dominant arm</b>                    |               |       |               |       |              |       |               |       |
| Normal tendon                          | 102           | 58.3% | 111           | 50.5% | 22           | 31.9% | 235           | 50.6% |
| Abnormal tendon/Partial thickness tear | 54            | 30.9% | 67            | 30.5% | 34           | 49.3% | 155           | 33.4% |
| Full-thickness tear 0-2.5 cm           | 14            | 8.0%  | 27            | 12.3% | 9            | 13.0% | 50            | 10.8% |
| Full-thickness tear >2.5 cm            | 5             | 2.9%  | 15            | 6.8%  | 4            | 5.8%  | 24            | 5.2%  |
| <b>Non-dominant arm</b>                |               |       |               |       |              |       |               |       |
| Normal tendon                          | 115           | 65.7% | 122           | 55.5% | 38           | 55.1% | 275           | 59.3% |
| Abnormal tendon/Partial thickness tear | 49            | 28.0% | 70            | 31.8% | 20           | 29.0% | 139           | 30.0% |
| Full-thickness tear 0-2.5 cm           | 10            | 5.7%  | 18            | 8.2%  | 7            | 10.1% | 35            | 7.5%  |
| Full-thickness tear >2.5 cm            | 1             | 0.6%  | 10            | 4.5%  | 4            | 5.8%  | 15            | 3.2%  |

266

### 267 Association of symptoms (all shoulders)

268 An analysis of symptom association was completed in 926 shoulders (463/464 participants due to loss  
 269 of one questionnaire). There were 289 (31.2%) symptomatic shoulders according to a dichotomised  
 270 OSS. The presence of symptoms was statistically significant between tendon groups ( $p<0.001$ );  
 271 51.6% of all full-thickness tears were symptomatic. There was no difference in age, BMI or arm  
 272 dominance between symptomatic or asymptomatic shoulders. The relative risks of having symptoms  
 273 compared to those with a reported normal tendon were as follows: Abnormal/Partial tears 1.969 (OR  
 274 1.991, 95%CI 1.454-2.727); full-thickness tears 0-2.5cm 2.203 (OR 2.366, 95%CI 1.465-3.891); and  
 275 full-thickness tears >2.5cm 4.718 (OR 9.800, 95%CI 4.638-20.705). All were significant ( $p<0.001$ )  
 276 with the model correctly predicting 71% of symptom outcomes correctly. The distribution of  
 277 symptoms across each tendon group is shown in Figure 2.

278

279 When the same analysis was performed using a 3-point change in the OSS to define symptoms the  
 280 results were not statistically different and compared to normal tendons were as follows:

281 Abnormal/Partial tears 1.793 (OR 1.936, 95%CI 1.374-2.726); full-thickness tears 0-2.5cm 2.098 (OR  
 282 2.506, 95%CI 1.513-4.150); and full-thickness tears >2.5cm 3.924 (OR 9.678, 95%CI 4.784-19.580).  
 283 All were significant ( $p<0.001$ ).

283

284 [INSERT FIGURE 2]

285 *Symptom severity*

286 For the 289 symptomatic shoulders the full OSS was reported (Table 3). Median age was significantly  
 287 different between groups ( $p=0.047$ ), with age increasing with tear stage severity. No statistically  
 288 significant between-group differences in BMI were identified, nor any within-group differences for  
 289 arm dominance.

290  
 291 Table 3. Demographics of the 289 symptomatic shoulders

|                              | N   | Median age | Mean BMI | Dominant arm (%) |
|------------------------------|-----|------------|----------|------------------|
| Normal                       | 116 | 70         | 28.3     | 46.6%            |
| Abnormal/Partial tear        | 109 | 73         | 28.4     | 54.1%            |
| Full-thickness tears 0-2.5cm | 35  | 72         | 28.1     | 62.9%            |
| Full-thickness tears >2.5cm  | 29  | 73         | 30.3     | 58.6%            |
| All                          | 289 | 71         | 28.5     | 50%              |

292  
 293 The mean OSS for symptomatic shoulders was 41.8. For normal tendons this was 42.5, abnormal  
 294 tendons, 42.1; full-thickness tears (0-2.5cm), 40.2; and full-thickness tears (>2.5cm), 38.4. There was  
 295 a statistical difference between the groups (1 way ANOVA  $p=0.030$ ). Linear regression analysis after  
 296 adjustment for age, BMI, and hand dominance (no interactions identified), showed that the only  
 297 significant difference in OSS scores was between normal tendons (mean OSS 42.5) and large full-  
 298 thickness tears (OSS 38.3),  $p=0.009$ , power 0.75 (overall model  $p=0.007$ , power 0.892).

300 *Association of symptoms (individuals)*

301 Table 4 shows the relationship between the individual, presence of full-thickness rotator cuff tear and  
 302 the likelihood of symptoms. A clustering effect of bilateral symptoms or lack thereof is present,  
 303 irrespective of the underlying pathology. After adjustment for age and BMI, compared to those with  
 304 bilaterally normal shoulders the relative risk of having at least one symptomatic shoulder in the  
 305 presence of a full thickness rotator cuff tear is 1.49 (OR 1.867, 95%CI 1.200-2.904), and 1.97 (OR  
 306 3.352, 95%CI 2.003-5.609) in the presence of at least a unilateral abnormality or cuff tear.

307  
 308 Table 4. Distribution of individual shoulder symptoms according to the presence of full-thickness  
 309 tears or tendon abnormalities

|                        | No Symptoms | Unilateral Symptoms | Bilateral Symptoms | Total |
|------------------------|-------------|---------------------|--------------------|-------|
| Bilateral No FTT       | 226         | 71                  | 63                 | 360   |
| Unilateral FTT         | 33          | 25                  | 24                 | 82    |
| Bilateral FTT          | 10          | 3                   | 8                  | 21    |
| Bilateral normal       | 131         | 28                  | 28                 | 187   |
| Unilateral abnormality | 72          | 34                  | 28                 | 134   |
| Bilateral abnormality  | 66          | 37                  | 39                 | 142   |
| Total                  | 269         | 99                  | 95                 | 463   |

### 310 *Shoulder pain and use of primary care health services*

311 Table 5 shows the proportion of individuals with shoulder pain, past or present, seeking medical  
 312 advice. The likelihood of seeking medical attention for shoulder pain was statistically different  
 313 between each pathology group (Chi<sup>2</sup> test p=0.005) reflecting the increasing likelihood of pain.  
 314 However, of those with pain the likelihood of seeking medical attention was not statistically different  
 315 between groups (Chi<sup>2</sup> test p=0.179). Overall, 28.3% (131/463) of all individuals had at some stage  
 316 seen their GP for shoulder pain. In this cohort, 8.9% (41/463) had seen their GP with shoulder pain  
 317 and a full-thickness tendon tear and 18.8% (87/463) had seen their GP with an abnormal tendon or  
 318 full thickness tear.

319  
 320 A multivariable regression model using all individuals was used to predict the likelihood of attending  
 321 a GP for shoulder pain. The presence of at least one full-thickness tear had a relative risk of 1.63 (OR  
 322 2.179, 95%CI 1.282-3.703) compared to those with normal tendons of attending the GP. There was  
 323 no statistical difference in relative risk of those with any tendon abnormality compared to those with  
 324 bilaterally normal shoulders.

325

326 Table 5. Proportion of individuals seeking medical advice

|                                                  | Present symptoms<br>(either shoulder) |                | Past or Present<br>symptoms<br>(either shoulder) |                 | All individuals<br>% seen GP |
|--------------------------------------------------|---------------------------------------|----------------|--------------------------------------------------|-----------------|------------------------------|
|                                                  | %                                     | % seen GP      | %                                                | % seen GP       |                              |
| All individuals<br>(n=463)                       | 41.9<br>(n=194)                       | 44.8<br>(n=87) | 55.7<br>(n=258)                                  | 50.8<br>(n=131) | 28.3<br>(n=131)              |
| Bilaterally normal<br>tendons<br>(n=187)         | 29.9<br>(n=56)                        | 41.1<br>(n=23) | 48.1<br>(n=90)                                   | 48.9<br>(n=44)  | 23.5<br>(n=44)               |
| At least one abnormality<br>(no tear)<br>(n=173) | 45.1<br>(n=78)                        | 41.0<br>(n=32) | 57.2<br>(n=99)                                   | 46.5<br>(n=46)  | 26.6<br>(n=46)               |
| At least one full-<br>thickness tear<br>(n=103)  | 58.3<br>(n=60)                        | 53.3<br>(n=32) | 67.0<br>(n=69)                                   | 59.4<br>(n=41)  | 39.8<br>(n=41)               |

327

## 328 **Discussion**

### 329 **Key results**

330 Using a large general population cohort of women aged 65-84 years, this study has reported on the  
 331 prevalence of rotator cuff pathology, the association of pathology to symptoms and uniquely the  
 332 consequential impact on health services.

333

334 The prevalence of rotator cuff pathology has been well reported in the literature, and this general  
 335 population study, supports previous findings. Prevalence was found to increase with every decile of  
 336 age, and the relative risk of having a full thickness tear increased more than two-fold between the 65-  
 337 69 and >80 age groups, suggesting age related change<sup>18</sup>. Overall, the prevalence of at least a unilateral  
 338 full thickness tear was 22%. The dominant arm was 1.64 times likely to be affected, inferring that the  
 339 presence of pathology may exist in shoulders with higher cumulative loading.

340  
341 The relative risk of having symptomatic pathology (worsening OSS scores) increased with tear stage  
342 severity, though the severity of symptoms did not increase accordingly. Although larger tear size  
343 increased the likelihood of symptom presence, 48.4% of full-thickness rotator cuff tears remained  
344 asymptomatic.

345  
346 The burden of musculoskeletal shoulder pain on health services is large, with 28.3% of individuals in  
347 this general population cohort having at some point sought medical advice for shoulder symptoms.  
348 This is the first study to look at the impact of rotator cuff pathology on the impact on the health  
349 services. Although on average only 50% of individuals with symptomatic rotator cuff tendon  
350 pathology (tendinopathy) will seek medical advice, the impact remains significant. Overall, almost  
351 10% of individuals in the general population have sought medical advice for shoulder symptoms in  
352 the presence of a full-thickness tear, and almost 20% of the population for any tendon abnormality.  
353 The major strength of this study is that it uses a large population-based cohort, and therefore not  
354 subject to selection bias. The cohort was originally investigated with the primary focus of  
355 osteoporosis, and not shoulder symptoms, thus any continued participation is not driven by shoulder  
356 symptoms.

#### 357 358 **Limitations (including bias)**

359 The cohort can only comment on associations in women aged between 65 and 84, but as previous  
360 studies have found no relationship between symptoms and age or sex<sup>23 30</sup>, this will not bias the  
361 results. Potential survival bias is introduced by the cohort being in its 20<sup>th</sup> year. If a greater proportion  
362 of individuals with pathology were lost to follow up this may cause us to under-estimate any  
363 association, however, no known associations exist in the literature between rotator cuff tears and other  
364 medical co-morbidities. Furthermore, as the prime goal of the cohort was not to investigate shoulder  
365 symptoms, this had no impact on continued study participation. Furthermore, only 463/516  
366 individuals that attended the year-20 study underwent a shoulder examination due to lack of an  
367 examiner being present at these follow up appointments. However, the age and BMI of the groups  
368 was not statistically different to the full cohort.

369  
370 Bias arising from having two examiners was ameliorated by two inter-observer reproducibility studies  
371 that demonstrated minimal effect of inter-observer analytic bias. Furthermore, to demonstrate  
372 ultrasound-scanning accuracy a learning curve study was undertaken a priori by both examiners,  
373 which demonstrated scanning accuracies comparable to those quoted in the literature. Inter-observer  
374 studies also demonstrated good reproducibility reducing analytic bias. Potential risk of overreporting  
375 pathology in symptomatic presentations is acknowledged as the assessor (ultrasonographer) was  
376 unblinded to the OSS result, as for pragmatic reasons due to lack of assessors, both assessments were  
377 carried out by the same individual. To overcome this, a small intra-observer study was completed,  
378 and an additional ultrasound scan was performed on 18 willing participants. The examiner was blind  
379 to all previous results and shoulder scores. Overall agreement gave a weighted kappa score of 0.915  
380 ( $p < 0.001$ ).

381  
382 The effect of tear size on symptom severity may have been underestimated in this study. The inability  
383 to transform the complete data set due to the skew of the OSS data, meant all asymptomatic shoulders  
384 had to be removed. Pain severity in the presence of a tear was then compared to a pain severity in a  
385 normal (no tendon pathology) shoulder. We recognise that there may be many causes of shoulder pain  
386 (e.g., rheumatological causes) and therefore referencing against all causes of painful shoulder may  
387 represent the contribution of rotator cuff tear to the symptoms.

1  
2  
3 388  
4 389 The definition of symptoms in previous studies varies widely with no consensus. The decision to use  
5 390 the OSS was based upon its content, construct validity in relation to our research question, and  
6 391 validation of use against other pain scores. Furthermore, dichotomisation of the scale at perfect vs.  
7 392 non-perfect scores is not validated and may make results too sensitive. However, we ran a comparison  
8 393 with 3-point change, as validated as clinically significant by the makers of the OSS, and there was no  
9 394 statistical difference.

10 395

#### 11 396 *Relationship to other studies*

12 397 This study has demonstrated similar prevalence figures to previous studies, but it is the first to use a  
13 398 general population cohort that has been extensively characterised as representative of the western  
14 399 world population.

15 400

16 401 Further studies have shown that the clinical presentation of rotator cuff tears varies and may or may  
17 402 not be associated with symptoms<sup>17 22 23</sup>. This general population cohort supports this with 48.4% of  
18 403 full-thickness rotator cuff tears being asymptomatic. Prior to this, the only other population-based  
19 404 study looking at symptom association with full-thickness tears was Yamamoto et al.<sup>30</sup> that  
20 405 investigated symptom association with full-thickness tears using a mountain cohort in Japan. They  
21 406 reported 34% of full-thickness tears to be symptomatic. However, unlike the current study, it was not  
22 407 a general population cohort representative of western society. Furthermore, it was subject to selection  
23 408 bias by removing any individuals with restricted shoulder movement or previous treatments.

24 409

25 410 Further studies have suggested that tear size affects the likelihood of symptoms. The current study  
26 411 supports this with larger tears having a greater than 2-fold increase in relative risk of symptoms than  
27 412 small tears<sup>17 22 23</sup>. A previous study in the Washington series investigated by Yamaguchi et al<sup>26</sup>,  
28 413 reported development of symptoms in previously asymptomatic tendons in the context of a  
29 414 contralateral symptomatic tear. However, this study was subject to selection bias as recruitment  
30 415 occurred in a cohort actively being treated for contralateral symptomatic rotator cuff tears which may  
31 416 have strengthened associations.

32 417

33 418 This is the first study that has looked at individuals as entities, rather than shoulders, and has  
34 419 highlighted the effect the individual has on symptom presentation, which could include physical and  
35 420 psychological factors unique to that individual – not solely the presence of tendon pathology on  
36 421 imaging. It is also the first study to look at the impact on health services.

37 422

38 423

#### 39 424 **Interpretation**

40 425 This study has shown that although patient reported pain on the Oxford Shoulder Score is associated  
41 426 with rotator cuff tendon pathology, it is not related to the severity of structural pathology identified on  
42 427 ultrasound imaging. The likelihood of pain also appears to be strongly dependent upon the individual  
43 428 rather than simply the pathology. Consequently, clinicians should rely less on imaging findings to  
44 429 explain the cause and severity of shoulder pain presentations. Furthermore, other drivers of shoulder  
45 430 pain should be considered (e.g. pain sensitisation), and treatment be targeted on symptom  
46 431 management rather than solely interventions to improve tendon pathology.

47 432

48 433 Investigation into the impact of musculoskeletal shoulder pain on the healthcare system revealed that  
49 434 28.8% of people in this general population cohort sought consultation with their GP for shoulder pain,  
50 435 a third of whom had a full thickness tear, and a third with at least one abnormality (no tear). This



1  
2  
3 436 study highlights the huge burden of shoulder pain on the healthcare system. Though, it does not  
4 437 demonstrate causality of pain as is shown by the lack of symptoms in nearly half of cases and the lack  
5 438 of correlation with the severity of pain and pathology. Nor does it show how the individual affects  
6 439 pain presentation.  
7  
8 440

8 440

### 9 441 **Generalisability**

10 442 This epidemiological study that is generalisable to the UK population, demonstrates association but  
11 443 not causality, and leaves unanswered questions as to what additional factors contribute to shoulder  
12 444 pain. Particularly interesting is how individuals may or may not have painful shoulders irrespective of  
13 445 the pathology. Further research into this could provide alternative targets to treatment methods, and  
14 446 potentially reduce the cost of imaging modalities and surgical interventions.  
15  
16 447

16 447

17 448

### 18 448 **Conclusion**

19 449 In conclusion, this population-based study has demonstrated that full-thickness rotator cuff tears are  
20 450 common affecting 22.1% of women over the age of 60, and tendon abnormalities affecting 59.4%.  
21 451 Despite 41.7% of individuals with a full-thickness tear (48.4% of all full-thickness tears) being  
22 452 asymptomatic, tendon abnormalities and tears are associated with pain. The likelihood, but not  
23 453 severity of symptoms, increases with greater structural damage.  
24  
25 454

25 454

26 455

27 455 This high prevalence and association of symptoms results in a significant impact on primary care  
28 456 health services, with 28.3% of this population having presented to a GP with shoulder pain. Of these a  
29 457 third had a full-thickness tear and a third had an abnormal but non-torn tendon. Overall, 8.9% of this  
30 458 cohort had seen their general practitioner with shoulder pain and a full-thickness tear, and 18.8% had  
31 459 seen their general practitioner with an abnormal or torn tendon.  
32  
33 460

32 459

33 460

34 461

35 462

### 35 462 **REFERENCES**

- 36  
37 1. Vos T, Abajobir AA, Abate KH, et al. Global, regional, and national incidence, prevalence,  
38 and years lived with disability for 328 diseases and injuries for 195 countries, 1990-  
39 2016: a systematic analysis for the Global Burden of Disease Study 2016. *The Lancet*  
40 2017;390(10100):1211-59. doi: 10.1016/S0140-6736(17)32154-2
- 41  
42 2. Urwin M, Symmons D, Allison T, et al. Estimating the burden of musculoskeletal disorders  
43 in the community: the comparative prevalence of symptoms at different anatomical  
44 sites, and the relation to social deprivation. *Annals of the Rheumatic Diseases*  
45 1998;57(11):649-55. doi: 10.1136/ard.57.11.649 [published Online First: 1999/01/30]
- 46  
47 3. Pope DP, Croft PR, Pritchard CM, et al. Prevalence of shoulder pain in the community: the  
48 influence of case definition. *Annals of the Rheumatic Diseases* 1997;56(5):308-12.  
49 doi: 10.1136/ard.56.5.308
- 50  
51 4. Bunker T. Rotator cuff disease. *Current Orthopaedics* 2002;16:223-33. doi:  
52 10.1054/cuor.2002.0257
- 53  
54 5. Meislin RJ, Sperling JW, Stitik TP. Persistent shoulder pain: epidemiology,  
55 pathophysiology, and diagnosis. *The American Journal of Orthopedics* 2005;34(12  
56 Suppl):5-9. [published Online First: 2006/02/03]
- 57  
58 6. Roquelaure Y, Ha C, Leclerc A, et al. Epidemiologic surveillance of upper-extremity  
59 musculoskeletal disorders in the working population. *Arthritis Rheumatology*  
60 2006;55(5):765-78. doi: 10.1002/art.22222 [published Online First: 2006/10/03]

- 1  
2  
3 7. Ng Man Sun S, Gillott E, Bhamra J, et al. Implant use for primary hip and knee  
4 arthroplasty: are we getting it right first time? *The Journal of Arthroplasty*  
5 2013;28(6):908-12. doi: 10.1016/j.arth.2012.11.012 [published Online First:  
6 2013/03/20]  
7
- 8 8. Hinsley H, Nicholls A, Daines M, et al. Classification of rotator cuff tendinopathy using  
9 high definition ultrasound. *Muscles Ligaments Tendons Journal* 2014;4(3):391-7.  
10 [published Online First: 2014/12/10]  
11
- 12 9. Teefey SA, Rubin DA, Middleton WD, et al. Detection and quantification of rotator cuff  
13 tears. Comparison of ultrasonographic, magnetic resonance imaging, and arthroscopic  
14 findings in seventy-one consecutive cases. *The Journal of Bone and Joint Surgery*  
15 *American Volume* 2004;86(4):708-16. [published Online First: 2004/04/08]  
16
- 17 10. de Jesus JO, Parker L, Frangos AJ, et al. Accuracy of MRI, MR arthrography, and  
18 ultrasound in the diagnosis of rotator cuff tears: a meta-analysis. *American Journal of*  
19 *Roentgenology* 2009;192(6):1701-7. doi: 10.2214/ajr.08.1241 [published Online  
20 First: 2009/05/22]  
21
- 22 11. Naqvi GA, Jadaan M, Harrington P. Accuracy of ultrasonography and magnetic resonance  
23 imaging for detection of full thickness rotator cuff tears. *International journal of*  
24 *shoulder surgery* 2009;3(4):94-97. doi: 10.4103/0973-6042.63218  
25
- 26 12. Smith TO, Back T, Toms AP, et al. Diagnostic accuracy of ultrasound for rotator cuff  
27 tears in adults: a systematic review and meta-analysis. *Clinical Radiology*  
28 2011;66(11):1036-48. doi: 10.1016/j.crad.2011.05.007 [published Online First:  
29 2011/07/09]  
30
- 31 13. Dinnes J, Loveman E, McIntyre L, et al. The effectiveness of diagnostic tests for the  
32 assessment of shoulder pain due to soft tissue disorders: a systematic review. *Health*  
33 *Technology Assessment* 2003;7(29):iii, 1-166. doi: 10.3310/hta7290 [published  
34 Online First: 2003/10/22]  
35
- 36 14. Ottenheim RP, Jansen MJ, Staal JB, et al. Accuracy of diagnostic ultrasound in patients  
37 with suspected subacromial disorders: a systematic review and meta-analysis.  
38 *Archives of Physical Medicine and Rehabilitation* 2010;91(10):1616-25. doi:  
39 10.1016/j.apmr.2010.07.017 [published Online First: 2010/09/30]  
40
- 41 15. Fehring EV, Sun J, VanOeveren LS, et al. Full-thickness rotator cuff tear prevalence  
42 and correlation with function and co-morbidities in patients sixty-five years and  
43 older. *Journal of Shoulder and Elbow Surgery* 2008;17(6):881-5. doi:  
44 10.1016/j.jse.2008.05.039 [published Online First: 2008/09/09]  
45
- 46 16. Milgrom C, Schaffler M, Gilbert S, et al. Rotator-cuff changes in asymptomatic adults.  
47 The effect of age, hand dominance and gender. *The Journal of Bone & Joint Surgery*  
48 *British Volume* 1995;77(2):296-8. [published Online First: 1995/03/01]  
49
- 50 17. Moosmayer S, Smith HJ, Tariq R, et al. Prevalence and characteristics of asymptomatic  
51 tears of the rotator cuff: an ultrasonographic and clinical study. *Journal of Bone and*  
52 *Joint Surgery British Volume* 2009;91(2):196-200. doi: 10.1302/0301-  
53 620x.91b2.21069 [published Online First: 2009/02/05]  
54
- 55 18. Tempelhof S, Rupp S, Seil R. Age-related prevalence of rotator cuff tears in  
56 asymptomatic shoulders. *Journal of Shoulder and Elbow Surgery* 1999;8(4):296-9.  
57 [published Online First: 1999/09/03]  
58
- 59 19. Reilly P, Macleod I, Macfarlane R, et al. Dead men and radiologists don't lie: a review of  
60 cadaveric and radiological studies of rotator cuff tear prevalence. *Annals of The Royal*  
*College of Surgeons of England* 2006;88(2):116-21. doi: 10.1308/003588406x94968  
[published Online First: 2006/03/23]

- 1  
2  
3 20. Yamamoto A, Takagishi K, Osawa T, et al. Prevalence and risk factors of a rotator cuff  
4 tear in the general population. *Journal of Shoulder and Elbow Surgery*  
5 2010;19(1):116-20. doi: 10.1016/j.jse.2009.04.006 [published Online First:  
6 2009/06/23]  
7
- 8 21. Schibany N, Zehetgruber H, Kainberger F, et al. Rotator cuff tears in asymptomatic  
9 individuals: a clinical and ultrasonographic screening study. *European Journal of*  
10 *Radiology* 2004;51(3):263-8. doi: 10.1016/s0720-048x(03)00159-1 [published Online  
11 First: 2004/08/06]  
12
- 13 22. Yamaguchi K, Ditsios K, Middleton WD, et al. The demographic and morphological  
14 features of rotator cuff disease. A comparison of asymptomatic and symptomatic  
15 shoulders. *Journal of Bone and Joint Surgery American Volume* 2006;88(8):1699-  
16 704. doi: 10.2106/jbjs.E.00835 [published Online First: 2006/08/03]  
17
- 18 23. Mall NA, Kim HM, Keener JD, et al. Symptomatic progression of asymptomatic rotator  
19 cuff tears: a prospective study of clinical and sonographic variables. *The Journal of*  
20 *Bone and Joint Surgery American Volume* 2010;92(16):2623-33. doi:  
21 10.2106/jbjs.I.00506 [published Online First: 2010/11/19]  
22
- 23 24. Needell SD, Zlatkin MB, Sher JS, et al. MR imaging of the rotator cuff: peritendinous and  
24 bone abnormalities in an asymptomatic population. *American Journal of*  
25 *Roentgenology* 1996;166(4):863-7. doi: 10.2214/ajr.166.4.8610564 [published Online  
26 First: 1996/04/01]  
27
- 28 25. Sher JS, Uribe JW, Posada A, et al. Abnormal findings on magnetic resonance images of  
29 asymptomatic shoulders. *The Journal of Bone and Joint Surgery American Volume*  
30 1995;77(1):10-5. doi: 10.2106/00004623-199501000-00002 [published Online First:  
31 1995/01/01]  
32
- 33 26. Yamaguchi K, Tetro AM, Blam O, et al. Natural history of asymptomatic rotator cuff  
34 tears: a longitudinal analysis of asymptomatic tears detected sonographically. *Journal*  
35 *of Shoulder and Elbow Surgery* 2001;10(3):199-203. doi: 10.1067/mse.2001.113086  
36 [published Online First: 2001/06/16]  
37
- 38 27. Chandnani V, Ho C, Gerharter J, et al. MR findings in asymptomatic shoulders: a blind  
39 analysis using symptomatic shoulders as controls. *Clinical Imaging* 1992;16(1):25-  
40 30. doi: 10.1016/0899-7071(92)90085-n [published Online First: 1992/01/01]  
41
- 42 28. Minagawa H, Yamamoto N, Abe H, et al. Prevalence of symptomatic and asymptomatic  
43 rotator cuff tears in the general population: From mass-screening in one village.  
44 *Journal of orthopaedics* 2013;10(1):8-12. doi: 10.1016/j.jor.2013.01.008 [published  
45 Online First: 2014/01/10]  
46
- 47 29. Harris JD, Pedroza A, Jones GL. Predictors of pain and function in patients with  
48 symptomatic, atraumatic full-thickness rotator cuff tears: a time-zero analysis of a  
49 prospective patient cohort enrolled in a structured physical therapy program.  
50 *American Journal of Sports Medicine* 2012;40(2):359-66. doi:  
51 10.1177/0363546511426003 [published Online First: 2011/11/19]  
52
- 53 30. Yamamoto A, Takagishi K, Kobayashi T, et al. Factors involved in the presence of  
54 symptoms associated with rotator cuff tears: a comparison of asymptomatic and  
55 symptomatic rotator cuff tears in the general population. *Journal of Shoulder and*  
56 *Elbow Surgery* 2011;20(7):1133-7. doi: 10.1016/j.jse.2011.01.011 [published Online  
57 First: 2011/04/02]  
58
- 59 31. Arden NK, Griffiths GO, Hart DJ, et al. The association between osteoarthritis and  
60 osteoporotic fracture: the Chingford Study. *The British Journal of Rheumatology*

- 1  
2  
3 1996;35(12):1299-304. doi: 10.1093/rheumatology/35.12.1299 [published Online  
4 First: 1996/12/01]  
5  
6 32. Hart DJ, Mootoosamy I, Doyle DV, et al. The relationship between osteoarthritis and  
7 osteoporosis in the general population: the Chingford Study. *Annals of the Rheumatic*  
8 *Diseases* 1994;53(3):158-62. doi: 10.1136/ard.53.3.158 [published Online First:  
9 1994/03/01]  
10  
11 33. Hart DJ, Spector TD. The relationship of obesity, fat distribution and osteoarthritis in  
12 women in the general population: the Chingford Study. *Journal of Rheumatology*  
13 1993;20(2):331-5. [published Online First: 1993/02/01]  
14  
15 34. Dawson J, Fitzpatrick R, Carr A. Questionnaire on the perceptions of patients about  
16 shoulder surgery. *The Journal of Bone and Joint Surgery British Volume*  
17 1996;78(4):593-600. [published Online First: 1996/07/01]  
18  
19 35. Dawson J, Rogers K, Fitzpatrick R, et al. The Oxford shoulder score revisited. *Archives of*  
20 *Orthopaedic and Trauma Surgery* 2009;129(1):119-23. doi: 10.1007/s00402-007-  
21 0549-7 [published Online First: 2008/01/10]  
22  
23 36. Murphy RJ, Daines MT, Carr AJ, et al. An independent learning method for orthopaedic  
24 surgeons performing shoulder ultrasound to identify full-thickness tears of the rotator  
25 cuff. *The Journal of Bone and Joint Surgery American Volume* 2013;95(3):266-72.  
26 doi: 10.2106/jbjs.K.00706 [published Online First: 2013/02/08]  
27  
28  
29  
30  
31  
32  
33  
34  
35  
36  
37  
38  
39  
40  
41  
42  
43  
44  
45  
46  
47  
48  
49  
50  
51  
52  
53  
54  
55  
56  
57  
58  
59  
60

**Figures**

Figure 1: Tendon classification on ultrasound

Figure 1 caption: (i) normal tendon: normal homogenous appearance throughout with no abnormality at the enthesis; (ii) abnormal tendon: loss of homogenous appearance and abnormal ragged enthesis +/- enlarged fluid-filled bursa or partial thickness tear; (iii) full thickness tear (0-2.5cm): lucent patch through the full thickness of the tendon with tear size defined as its width in the sagittal plane (iv) full-thickness tears (>2.5cm): Evidence of large defect or no evidence of tendon tissue present.

Figure 2: Distribution of symptoms across each tendon group

For peer review only

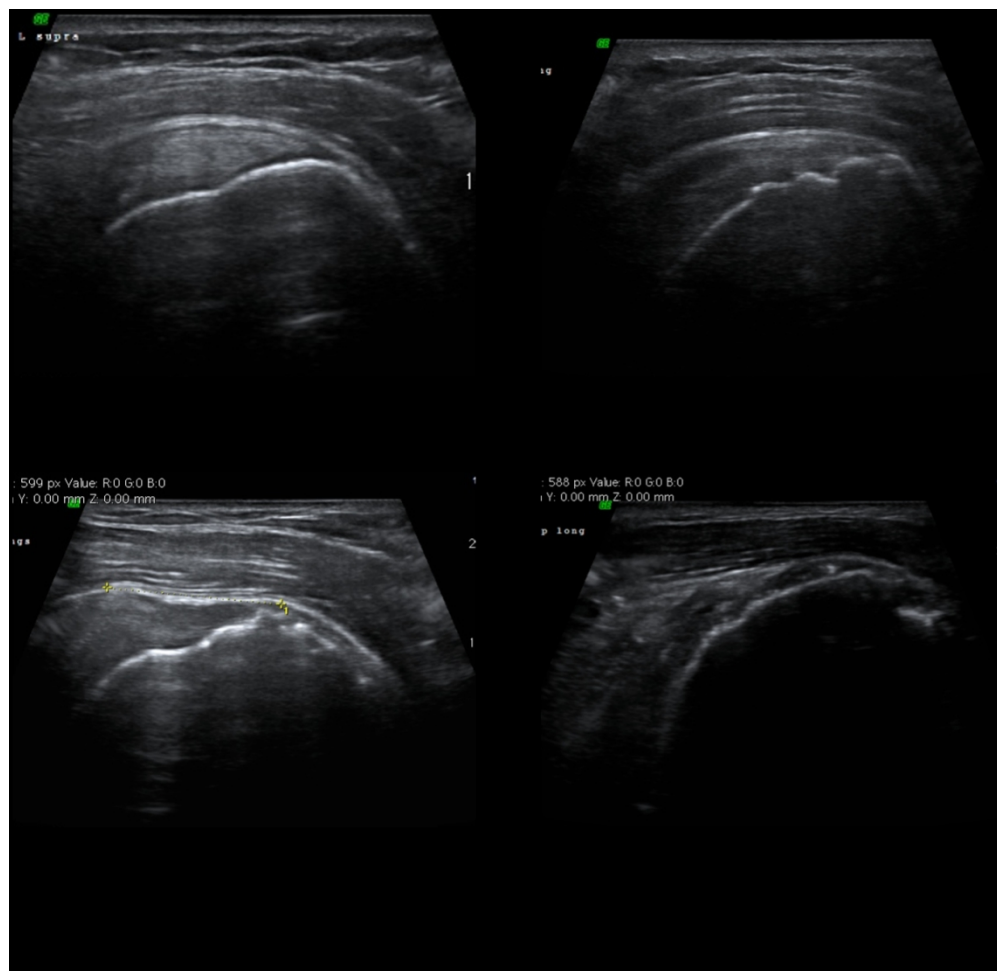

Tendon classification on ultrasound: (i) normal tendon: normal homogenous appearance throughout with no abnormality at the enthesis; (ii) abnormal tendon: loss of homogenous appearance and abnormal ragged enthesis +/- enlarged fluid-filled bursa or partial thickness tear; (iii) full thickness tear (0-2.5cm): lucent patch through the full thickness of the tendon with tear size defined as its width in the sagittal plane (iv) full-thickness tears (>2.5cm): Evidence of large defect or no evidence of tendon tissue present.

106x102mm (330 x 330 DPI)

1  
2  
3  
4  
5  
6  
7  
8  
9  
10  
11  
12  
13  
14  
15  
16  
17  
18  
19  
20  
21  
22  
23  
24  
25  
26  
27  
28  
29  
30  
31  
32  
33  
34  
35  
36  
37  
38  
39  
40  
41  
42  
43  
44  
45  
46  
47  
48  
49  
50  
51  
52  
53  
54  
55  
56  
57  
58  
59  
60

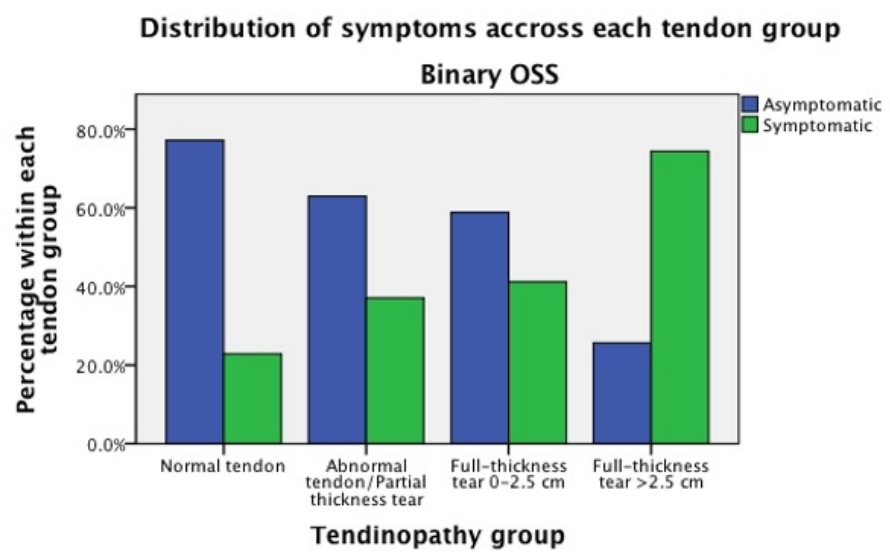

Figure 2. Distribution of symptoms across each tendon group

116x68mm (144 x 144 DPI)

## STROBE Statement—checklist of items that should be included in reports of observational studies

|                              | Item No. | Recommendation                                                                                                                                                                             | Page No.  | Relevant text from manuscript |
|------------------------------|----------|--------------------------------------------------------------------------------------------------------------------------------------------------------------------------------------------|-----------|-------------------------------|
| <b>Title and abstract</b>    | 1        | (a) Indicate the study's design with a commonly used term in the title or the abstract                                                                                                     | Page 1 -  | title of the manuscript       |
|                              |          | (b) Provide in the abstract an informative and balanced summary of what was done and what was found                                                                                        | Page 3    |                               |
| <b>Introduction</b>          |          |                                                                                                                                                                                            |           |                               |
| Background/rationale         | 2        | Explain the scientific background and rationale for the investigation being reported                                                                                                       | Page 4 -  | line 128-153                  |
| Objectives                   | 3        | State specific objectives, including any prespecified hypotheses                                                                                                                           | page 4    | lines 150-154                 |
| <b>Methods</b>               |          |                                                                                                                                                                                            |           |                               |
| Study design                 | 4        | Present key elements of study design early in the paper                                                                                                                                    | Page 4 -  | lines 165-176                 |
| Setting                      | 5        | Describe the setting, locations, and relevant dates, including periods of recruitment, exposure, follow-up, and data collection                                                            | Page 4 -  | lines 165-176                 |
| Participants                 | 6        | (a) <i>Cohort study</i> —Give the eligibility criteria, and the sources and methods of selection of participants. Describe methods of follow-up                                            | Pages -   | lines 165-176                 |
|                              |          | <i>Case-control study</i> —Give the eligibility criteria, and the sources and methods of case ascertainment and control selection. Give the rationale for the choice of cases and controls |           |                               |
|                              |          | <i>Cross-sectional study</i> —Give the eligibility criteria, and the sources and methods of selection of participants                                                                      |           |                               |
|                              |          | (b) <i>Cohort study</i> —For matched studies, give matching criteria and number of exposed and unexposed                                                                                   |           |                               |
|                              |          | <i>Case-control study</i> —For matched studies, give matching criteria and the number of controls per case                                                                                 |           |                               |
| Variables                    | 7        | Clearly define all outcomes, exposures, predictors, potential confounders, and effect modifiers. Give diagnostic criteria, if applicable                                                   | Page 5 -  | lines 182-198                 |
| Data sources/<br>measurement | 8*       | For each variable of interest, give sources of data and details of methods of assessment (measurement). Describe comparability of assessment methods if there is more than one group       | Page 5 -  | lines 181-198                 |
| Bias                         | 9        | Describe any efforts to address potential sources of bias                                                                                                                                  | Page 10 - | lines 351-393                 |
| Study size                   | 10       | Explain how the study size was arrived at                                                                                                                                                  | Page 4 -  | Lines 174-177                 |

Continued on next page



1  
2  
3  
4  
5  
6  
7  
8  
9  
10  
11  
12  
13  
14  
15  
16  
17  
18  
19  
20  
21  
22  
23  
24  
25  
26  
27  
28  
29  
30  
31  
32  
33  
34  
35  
36  
37  
38  
39  
40  
41  
42  
43  
44  
45  
46

|                        |     |                                                                                                                                                                                                                                                                                                                                                                                                                                                                                                                                                                   |                                           |
|------------------------|-----|-------------------------------------------------------------------------------------------------------------------------------------------------------------------------------------------------------------------------------------------------------------------------------------------------------------------------------------------------------------------------------------------------------------------------------------------------------------------------------------------------------------------------------------------------------------------|-------------------------------------------|
| Quantitative variables | 11  | Explain how quantitative variables were handled in the analyses. If applicable, describe which groupings were chosen and why                                                                                                                                                                                                                                                                                                                                                                                                                                      | Page 5-6 - lines 207-236                  |
| Statistical methods    | 12  | (a) Describe all statistical methods, including those used to control for confounding<br>(b) Describe any methods used to examine subgroups and interactions<br>(c) Explain how missing data were addressed<br>(d) <i>Cohort study</i> —If applicable, explain how loss to follow-up was addressed<br><i>Case-control study</i> —If applicable, explain how matching of cases and controls was addressed<br><i>Cross-sectional study</i> —If applicable, describe analytical methods taking account of sampling strategy<br>(e) Describe any sensitivity analyses | SECTION 12 - Page 5-6 - lines 207-236     |
| <b>Results</b>         |     |                                                                                                                                                                                                                                                                                                                                                                                                                                                                                                                                                                   |                                           |
| Participants           | 13* | (a) Report numbers of individuals at each stage of study—eg numbers potentially eligible, examined for eligibility, confirmed eligible, included in the study, completing follow-up, and analysed<br>(b) Give reasons for non-participation at each stage<br>(c) Consider use of a flow diagram                                                                                                                                                                                                                                                                   | Page 6 - lines 239-246                    |
| Descriptive data       | 14* | (a) Give characteristics of study participants (eg demographic, clinical, social) and information on exposures and potential confounders<br>(b) Indicate number of participants with missing data for each variable of interest<br>(c) <i>Cohort study</i> —Summarise follow-up time (eg, average and total amount)                                                                                                                                                                                                                                               | Page 6 - lines 239-246                    |
| Outcome data           | 15* | <i>Cohort study</i> —Report numbers of outcome events or summary measures over time<br><i>Case-control study</i> —Report numbers in each exposure category, or summary measures of exposure<br><i>Cross-sectional study</i> —Report numbers of outcome events or summary measures                                                                                                                                                                                                                                                                                 | Pages 6-9                                 |
| Main results           | 16  | (a) Give unadjusted estimates and, if applicable, confounder-adjusted estimates and their precision (eg, 95% confidence interval). Make clear which confounders were adjusted for and why they were included<br>(b) Report category boundaries when continuous variables were categorized<br>(c) If relevant, consider translating estimates of relative risk into absolute risk for a meaningful time period                                                                                                                                                     | Results tables, pages 6-9 - lines 248-325 |

Continued on next page

|                          |    |                                                                                                                                                                            |                         |
|--------------------------|----|----------------------------------------------------------------------------------------------------------------------------------------------------------------------------|-------------------------|
| Other analyses           | 17 | Report other analyses done—eg analyses of subgroups and interactions, and sensitivity analyses                                                                             | Not applicable          |
| <b>Discussion</b>        |    |                                                                                                                                                                            |                         |
| Key results              | 18 | Summarise key results with reference to study objectives                                                                                                                   | Page 9- lines 328-351   |
| Limitations              | 19 | Discuss limitations of the study, taking into account sources of potential bias or imprecision. Discuss both direction and magnitude of any potential bias                 | Page 10 - 356-392       |
| Interpretation           | 20 | Give a cautious overall interpretation of results considering objectives, limitations, multiplicity of analyses, results from similar studies, and other relevant evidence | Page 11 - lines 422-437 |
| Generalisability         | 21 | Discuss the generalisability (external validity) of the study results                                                                                                      | Page 11 - lines 440-445 |
| <b>Other information</b> |    |                                                                                                                                                                            |                         |
| Funding                  | 22 | Give the source of funding and the role of the funders for the present study and, if applicable, for the original study on which the present article is based              | Page 2 - lines 50-53    |

\*Give information separately for cases and controls in case-control studies and, if applicable, for exposed and unexposed groups in cohort and cross-sectional studies.

**Note:** An Explanation and Elaboration article discusses each checklist item and gives methodological background and published examples of transparent reporting. The STROBE checklist is best used in conjunction with this article (freely available on the Web sites of PLoS Medicine at <http://www.plosmedicine.org/>, Annals of Internal Medicine at <http://www.annals.org/>, and Epidemiology at <http://www.epidem.com/>). Information on the STROBE Initiative is available at [www.strobe-statement.org](http://www.strobe-statement.org).
